1 **Peroxide antimalarial drugs target redox homeostasis in *Plasmodium falciparum* infected red**  
2 **blood cells**

3 Ghizal Siddiqui<sup>1#</sup>, Carlo Giannangelo<sup>1#</sup>, Amanda De Paoli<sup>1</sup>, Anna Katharina Schuh<sup>2</sup>, Kim C.  
4 Heimsch<sup>2</sup>, Dovile Anderson<sup>1</sup>, Timothy G. Brown<sup>3</sup>, Christopher A. MacRaild<sup>1</sup>, Jianbo Wu<sup>4</sup>, Xiaofang  
5 Wang<sup>4</sup>, Yuxiang Dong<sup>4</sup>, Jonathan L. Vennerstrom<sup>4</sup>, Katja Becker<sup>2</sup>, and Darren J Creek<sup>1\*</sup>

6 <sup>1</sup>Drug Delivery, Disposition and Dynamics, Monash Institute of Pharmaceutical Sciences, Monash  
7 University, 381 Royal Parade, Parkville, Victoria 3052, Australia;

8 <sup>2</sup>Biochemistry and Molecular Biology, Interdisciplinary Research Center, Justus Liebig University  
9 Giessen, 35392 Giessen, Germany.

10 <sup>3</sup>Drug Discovery Biology, Monash Institute of Pharmaceutical Sciences, Monash University, 381  
11 Royal Parade, Parkville, Victoria 3052, Australia;

12 <sup>4</sup>College of Pharmacy, University of Nebraska Medical Center, 986125 Nebraska Medical Center,  
13 Omaha, Nebraska 68198-6125, United States

14 <sup>#</sup>These authors contributed equally

15 \* Corresponding author: Darren J. Creek, Drug Delivery, Disposition and Dynamics, Monash Institute  
16 of Pharmaceutical Sciences, Monash University, Parkville, Victoria 3052, Australia. Tel: +61 (0) 3  
17 9903 9249; Fax: +61 (0) 3 9903 9583; e-mail, [Darren.creek@monash.edu](mailto:Darren.creek@monash.edu)

18

19 **Abstract**

20 *Plasmodium falciparum* causes the most lethal form of malaria. Peroxide antimalarials based on  
21 artemisinin underpin the frontline treatments for malaria, but artemisinin resistance is rapidly  
22 spreading. Synthetic peroxide antimalarials, known as ozonides, are in clinical development and offer  
23 a potential alternative. Here, we used chemoproteomics to investigate the protein alkylation targets of  
24 artemisinin and ozonide probes, including an analogue of the ozonide clinical candidate, artefenomel.  
25 We greatly expanded the list of protein targets for peroxide antimalarials and identified significant  
26 enrichment of redox-related proteins for both artemisinins and ozonides. Disrupted redox homeostasis  
27 was confirmed by dynamic live imaging of the glutathione redox potential using a genetically  
28 encoded redox-sensitive fluorescence-based biosensor. Targeted LC-MS-based thiol metabolomics  
29 also confirmed changes in cellular thiol levels. This work shows that peroxide antimalarials  
30 disproportionately alkylate proteins involved in redox homeostasis and that disrupted redox processes  
31 are involved in the mechanism of action of these important antimalarials.

32 **Importance**

33 The frontline treatments for malaria are combination therapies based on the peroxide antimalarial,  
34 artemisinin. Concerningly, artemisinin resistance has emerged in malaria-endemic regions, and now  
35 poses a major threat to malaria treatment and eradication efforts. New medicines are urgently required  
36 to replace the artemisinins, and some of the most advanced candidates are the fully synthetic peroxide  
37 antimalarials, OZ277 (arterolane) and OZ439 (artefenomel). The mechanism of action of peroxide  
38 antimalarials involves the reductive activation of the peroxide bond by intra-parasitic haem, but there  
39 is no consensus regarding the specific protein targets of the resulting radical species for artemisinins  
40 and/or the ozonides. This study provides a comprehensive and unbiased chemoproteomic profile of  
41 over 400 target proteins, and confirms the specific impact of peroxide antimalarials on redox  
42 metabolism. The key role of redox targets is particularly relevant considering that the mechanism of  
43 artemisinin resistance appears to involve modulation of peroxide activation and redox homeostasis.

44

45 **Keywords:** *Plasmodium falciparum*, Chemoproteomics, Malaria, Peroxides, Ozonides, Artemisinins,  
46 Redox homeostasis, Glutathione.

## 47 **Introduction**

48 Malaria is a major global health challenge and an estimated 409 000 deaths and 229 million new  
49 malaria cases occurred worldwide in 2019<sup>1</sup>. The majority of malaria-related mortality is due to  
50 infection with the deadliest parasite species, *Plasmodium falciparum*. Currently, antimalarial drugs  
51 are one of the most powerful tools for combating malaria. The first-line treatment options for  
52 uncomplicated malaria are artemisinin-based combination therapies (ACTs). However, the emergence  
53 and spread of parasite strains that are resistant to multiple antimalarial drugs is a major challenge to  
54 malaria treatment.

55 The clinically-used artemisinins, such as artemether, artesunate and dihydroartemisinin (DHA), are  
56 semisynthetic derivatives of the natural product artemisinin and possess a 1,2,4-trioxane core  
57 incorporating a peroxide bond that is essential for activity<sup>2</sup>. Artemisinins clear *P. falciparum*  
58 infections rapidly and provide prompt resolution of malaria symptoms in patients with both  
59 uncomplicated and severe infections<sup>3</sup>. However, artemisinins are limited by poor biopharmaceutical  
60 properties and short *in vivo* half-lives (typically < 1 h in humans)<sup>4</sup>. This necessitates a 3-day treatment  
61 regimen and coadministration with a long acting partner drug.

62 To overcome some of these limitations, the peroxide bond of artemisinin was used as inspiration for  
63 the design of synthetic peroxide antimalarials, collectively known as ozonides. The first-generation  
64 ozonide, OZ277 (arterolane), was found to be rapidly acting and exhibits similar blood-stage activity  
65 to clinically-used artemisinin derivatives, both *in vitro* and *in vivo*<sup>5</sup>. In 2012, OZ277 was the first  
66 synthetic peroxide antimalarial to be approved for clinical use. Continued development of the  
67 ozonides led to a second-generation series of compounds that had a significantly improved *in vivo*  
68 exposure profile and maintained the potent *in vitro* and *in vivo* activity of the first-generation  
69 compounds<sup>6-7</sup>. The second generation ozonide clinical candidate, OZ439 (artefenomel), is the first  
70 long half-life peroxide antimalarial to be tested clinically<sup>8-9</sup> and has reached advanced stages of  
71 development in combination with ferroquine.

72 Artemisinins and ozonides are thought to act through similar mechanisms as both classes require the  
73 peroxide pharmacophore for activity<sup>2, 10-11</sup>. The proposed mechanism of action involves initial  
74 bioactivation by haem released through parasite digestion of haemoglobin<sup>12-15</sup>. This process results in  
75 cleavage of the peroxide bond and generation of carbon-centered radicals<sup>11, 16</sup> that alkylate haem<sup>17-18</sup>  
76 and proteins<sup>19-26</sup> and induce widespread oxidative stress<sup>27-31</sup>. Death of the parasite likely results from  
77 disruption to multiple vital processes, including haemoglobin degradation in the food vacuole<sup>32</sup>.

78 Concerningly, parasites with decreased sensitivity to artemisinins have emerged in the Greater  
79 Mekong Subregion<sup>33</sup>, and more recently in eastern India<sup>34</sup>, Africa<sup>35</sup> and Papua New Guinea<sup>36</sup>.  
80 Clinically this manifests as delayed parasite clearance following treatment with an ACT<sup>37-38</sup> and can  
81 lead to approximately 50% treatment failure in areas with concomitant partner drug resistance<sup>39-40</sup>.

82 Delayed parasite clearance is associated with point mutations in the propeller domain of the *P.*  
83 *falciparum* Kelch 13 protein<sup>41</sup> and decreased parasite susceptibility to short exposures of artemisinin  
84 *in vitro*<sup>42-43</sup>. Although the delayed parasite clearance phenotype does not represent complete  
85 resistance<sup>44</sup>, the emergence of these parasites poses a major threat to global malaria control efforts.  
86 For this reason, it is critically important to understand the mechanism of action of antimalarial  
87 peroxides, with a view to overcoming resistance. The potential for cross-resistance between  
88 artemisinins and ozonides has also been the subject of considerable debate<sup>45</sup> and some reports suggest  
89 that the second-generation series of ozonides, e.g. OZ439, may be less susceptible to the mechanisms  
90 underpinning decreased artemisinin sensitivity<sup>46-48</sup>. This raises the prospect that first generation  
91 ozonides, second generation ozonides and artemisinins could alkylate unique targets within the  
92 parasite. Previous click chemistry-based proteomics studies aimed at identifying the protein targets of  
93 peroxides have shown that artemisinin and simple ozonide probe compounds (containing the 1,2,4-  
94 trioxolane core flanked by a cyclohexane moiety on one side and an adamantane group on the other)  
95 share a common alkylation signature<sup>22</sup>. Whereas, others have proposed that protein alkylation is  
96 indiscriminate and stochastic<sup>20, 23</sup>.

97 Here, we used chemical proteomics to directly compare the temporal protein alkylation profile of  
98 clickable peroxide probes based on artemisinin, the simple ozonide core structure and the ozonide  
99 clinical candidate, OZ439. We employed a unique data independent acquisition mass spectrometry  
100 (DIA-MS) approach and extensive controls to generate an extended and robust list of protein  
101 alkylation targets for peroxide antimalarials, identifying redox homeostasis proteins as key targets.  
102 The impact to redox homeostasis was confirmed using a ratiometric redox sensor consisting of human  
103 glutaredoxin 1 fused to a reduction-oxidation sensitive GFP (hGrx-1-roGFP2)<sup>49</sup> and targeted LCMS-  
104 based thiol metabolomics. Taken together, we demonstrate that the mechanism of action of peroxide  
105 antimalarials involves disproportionate alkylation of proteins involved with redox processes and  
106 significant disruption to *P. falciparum* redox homeostasis.

## 107 **Results**

### 108 **Design and synthesis of alkyne peroxide probes for protein target identification**

109 To profile and identify the protein targets of peroxide antimalarials, we designed and synthesised a  
110 series of ozonide and artemisinin probe compounds with a clickable alkyne tag (Figure 1A). The  
111 alkyne tag can be further appended with agarose beads through click chemistry, allowing the targets  
112 of the peroxide probes to be affinity purified for mass spectrometric analysis (Figure 1B). The active  
113 peroxide probes (AA2, OZ727 and OZ747) containing alkyne functionality retained potency against  
114 *P. falciparum* 3D7 parasites as determined by their IC<sub>50</sub> *in vitro*, whereas the alkyne-modified non-  
115 peroxide control probe, carbaOZ727, was inactive (Figure 1A). These findings confirmed that  
116 addition of the clickable alkyne tag does not interfere with probe efficacy and that antimalarial  
117 activity is peroxide-bond dependent.

118 We employed a time course treatment and comprehensive control strategy for our affinity purification  
119 experiments to ensure specific and high confidence identification of biologically relevant protein  
120 targets (Figure 1B). The inactive (clickable) non-peroxide probe, carbaOZ727, and non-clickable  
121 parent ozonide, OZ03, acted as controls for false positive protein identifications. OZ03 also served as  
122 a competitive inhibitor of probe binding *in situ* to distinguish specific versus non-specific protein hits  
123 (Figure 1B). As parasite degradation of haemoglobin provides the iron source for peroxide activation,  
124 we blocked peroxide activation *in situ* with E64d (Figure 1B), a falcipain haemoglobinase inhibitor  
125 known to antagonise the antimalarial effects of peroxides<sup>12-13, 27</sup>, to further eliminate proteins unlikely  
126 to be involved with the action of peroxides in parasite killing.

### 127 **Identification of protein targets of peroxide antimalarials**

128 For the identification of peroxide covalent binding targets, synchronised trophozoite cultures were  
129 incubated for 1-6 h with 300 nM of the alkyne probes, OZ727, OZ747 or AA2. Following parasite  
130 isolation and protein extraction, alkyne labelled proteins were affinity purified by copper catalysed  
131 click chemistry onto azide agarose beads and protein targets were identified with DIA-MS (Figure  
132 1B). Protein intensities were used to provide semi quantitative analysis of protein abundances for a  
133 total of 928 parasite proteins identified across all sample groups (Supplementary Data 1). Proteins in  
134 the OZ727, OZ747 and AA2 groups with a fold-change  $\geq 2$  compared to the DMSO, carbaOZ727 and  
135 time-matched OZ03 controls, and with a p-value  $< 0.05$  (Mann-Whitney *U* test) compared to  
136 carbaOZ727 or DMSO, were considered as protein targets. After removal of false positive protein  
137 identifications and non-specific protein hits, a total of 182, 94 and 261 parasite proteins were  
138 respectively identified as targets of OZ727, OZ747 and AA2 after 1 h of treatment (at least four  
139 independent experiments) (Figure 2A). OZ727 labelling was markedly decreased by co-incubation  
140 with increasing concentrations of OZ03 (active non-clickable parent ozonide), indicating that the  
141 engineered alkyne probes alkylate the same targets as their non-clickable parents (Figure 2A and

142 Supplementary Data 1). Furthermore, pre-incubation of parasite cultures with E64d drastically  
143 decreased labelling of proteins with OZ727 (Figure 2A and Supplementary Data 1), consistent with  
144 reports that inhibiting haemoglobin digestion abrogates peroxide activity<sup>12-13, 27, 50</sup>. Taken together,  
145 these results indicate the alkyne probes are pharmacologically similar to the parent compounds and  
146 the protein targets identified in this study are associated with their antimalarial peroxide activity<sup>51</sup>.

147 Importantly, the proteins labelled by OZ727, OZ747 and AA2 were not simply the proteins that are  
148 reproducibly detected as the most abundant proteins in untargeted proteomic studies of *P. falciparum*  
149 parasites (Figure 2B). Approximately 45% of the proteins identified as targets of peroxides were  
150 among the top 500 most abundant proteins in the *P. falciparum* blood stage proteome. This contrasts  
151 with previous peroxide chemical proteomics studies, where between 60% and 80% of proteins  
152 identified were among the most abundant proteins<sup>21, 23</sup>. A significant proportion of the proteins  
153 identified as peroxide targets were also detected by Wang *et al.*<sup>23</sup> (55%) and Ismail *et al.*<sup>21</sup> (36%)  
154 (Figure S1A). However, only 13 proteins were common between all three studies and these were all  
155 highly expressed *P. falciparum* blood stage proteins, with the exception of the putative Fe-S cluster  
156 assembly protein DRE2 (PF3D7\_0824600) (Figure S1B). In another peroxide chemical proteomic  
157 study, where the NF54 parasite line was used, 25 protein targets were identified with 100 ng/mL of  
158 the chemical probes (similar to the probe concentration used in this study). Of the 25 *P. falciparum*  
159 proteins identified as targets, 8 were also identified in our list of targets; however, these 8 proteins  
160 were not the same as the common 13 proteins identified across the other studies<sup>20</sup>. In addition to these  
161 commonly identified proteins, our unique data acquisition approach with extensive controls added a  
162 further 352 biologically relevant proteins to the list of peroxide targets in *P. falciparum* (Figure S1B).

163 In our dataset, approximately 30% of the combined 435 proteins alkylated by OZ727, OZ747 and  
164 AA2 were identified as targets for all three compounds. A range of proteins were also identified as  
165 unique targets for OZ727 (79 proteins), OZ747 (35 proteins) or AA2 (59 proteins). For example, AA2  
166 alkylated several proteins involved in vesicle-mediated transport (PF3D7\_0303000, PF3D7\_1231100  
167 and PF3D7\_1429800) that were not binding targets for OZ727 or OZ747. Similarly, several proteins  
168 involved in nucleotide biosynthesis (PF3D7\_0206700, PF3D7\_0629100, PF3D7\_1012600 and  
169 PF3D7\_1437200), an essential pathway for parasite growth and survival, were only alkylated by  
170 OZ727, while OZ747 uniquely alkylated proteins involved in ion transport (PF3D7\_0715900 and  
171 PF3D7\_1362300). Some of the major proteins previously identified as targets of artemisinin and  
172 simple ozonide probe compounds, such as translationally controlled tumour protein  
173 (PF3D7\_0511000)<sup>52</sup>, actin 1 (PF3D7\_1246200), ornithine aminotransferase (PF3D7\_0608800) and  
174 the glycolytic enzymes, lactate dehydrogenase (PF3D7\_1324900), enolase (PF3D7\_1015900) and  
175 glyceraldehyde-3-phosphate dehydrogenase (PF3D7\_1462800)<sup>21-23</sup>, were confirmed as targets for  
176 AA2 and OZ727, but were not alkylated by the OZ439 analogue, OZ747.

177 We performed gene ontology (GO) enrichment analysis to identify the major cellular processes and  
178 compartments targeted by the peroxide antimalarials. These data showed that the targets of OZ727,  
179 OZ747 and AA2 were significantly enriched in several cellular components, including the cytosol,  
180 ribosome, nucleus and food vacuole (Supplementary Data 2). Notably, the food vacuole  
181 (GO:0020020) was the most significantly enriched compartment for both OZ727 (p-value = 9.90E-12)  
182 and AA2 (p-value = 1.30E-15) at the 1 h timepoint and was the second most significantly enriched  
183 compartment for OZ747 (p-value = 0.00019) (Supplementary Data 2). Pre-treatment with E64d and  
184 co-incubation with increasing concentrations of OZ03 inhibited OZ727 binding to food vacuole  
185 proteins (Figure S2), confirming that these targets are important for peroxide activity. These findings  
186 are consistent with peroxides initially acting by disrupting parasite haemoglobin digestion<sup>32</sup>, an  
187 essential process that occurs within the parasite food vacuole. GO analysis further revealed that  
188 peroxide protein targets were involved in numerous essential biological processes of the parasite  
189 (Figure 3 and Supplementary Data 3). Several significantly enriched biological processes were  
190 identified in redox homeostasis, metabolism, nuclear transport and stress response (Figure 3). To  
191 control for non-specific protein binding, enrichment analysis of proteins identified in the control  
192 samples found GO terms associated with nuclear transport and stress response, suggesting that those  
193 functions may not be specifically targeted by these drugs. However, enrichment of GO terms  
194 associated with redox homeostasis and metabolism were specific to the peroxide-treated parasites and  
195 not the controls (Figure 3 and Supplementary Data 3). Of these, cell redox homeostasis (GO:0045454)  
196 was one of the most significantly enriched biological process GO terms for both OZ727 (p = 0.00015)  
197 and AA2 (p = 0.0016) after 1 h and was not enriched in the control dataset (Figure S3 and  
198 Supplementary Data 3).

199 A targeted analysis of the 28 proteins within the cell redox homeostasis GO term identified 9 peroxide  
200 targets that were enriched by both OZ727 and AA2 within 1 h of treatment (Figure S4A), and  
201 alkylation was decreased upon co-incubation of OZ727 with OZ03 or pre-incubation with E64d  
202 (Figure S4B). The enriched proteins included several thioredoxin proteins, which are important for  
203 maintaining parasite antioxidant defences and regulating redox activity of proteins<sup>53</sup>. Similar trends  
204 were seen for these proteins in the OZ747 group (Figure S4A). Oxidation reduction (GO:0055114)  
205 and response to oxidative stress (GO:0006979) processes were also significantly enriched biological  
206 process GO terms (Supplementary Data 3). Combined, these data suggest that altered redox regulation  
207 is an important mechanism for the activity of antimalarial peroxides.

### 208 **Validation of recombinant hGrx1-roGFP2 probe with peroxide antimalarial drugs *in vitro***

209 To further investigate the effects of peroxide antimalarials on the redox status of *P. falciparum*  
210 parasites, we used the genetically integrated ratiometric redox-sensor hGrx1-roGFP2 (human  
211 glutaredoxin 1 fused to reduction-oxidation sensitive green fluorescent protein), expressed in the



212 cytosol of the NF54*attB* *P. falciparum* parasite line (NF54*attB*<sup>[hGrx1-roGFP2]</sup>)<sup>49</sup>. In order to exclude a  
213 direct influence of the drugs on the probe, we initially characterised the interaction of the peroxides  
214 with recombinant hGrx1-roGFP2 *in vitro*. DHA, and the ozonides, OZ277 and OZ439, were tested at  
215 concentrations ranging from 0.1  $\mu$ M to 1 mM for up to 10 h in standard reaction buffer containing  
216 ferrous iron (to activate the endoperoxide bond) in a plate reader. When compared to DMSO control,  
217 the drugs did not significantly affect the fluorescence ratio of recombinant hGrx1-roGFP2 over time  
218 (Figure S5), which is consistent with previously published data for peroxides and recombinant hGrx1-  
219 roGFP2<sup>54-55</sup>. The recombinant protein was fully oxidised with 1 mM diamide (DIAM) and fully  
220 reduced with 10 mM dithiothreitol (DTT) (Figure S5).

### 221 **Time-dependent effects of peroxides on the glutathione redox potential of *P. falciparum***

222 The redox effects of clinically relevant concentrations and exposures of DHA, OZ277 and OZ439  
223 were assessed using NF54*attB*<sup>[hGrx1-roGFP2]</sup> transgenic parasites in both confocal laser scanning  
224 microscopy (CLSM) and plate reader assays (Figure 4, S6A and S6B). To measure the completely  
225 oxidised and reduced state of the probe, 30-34 h.p.i trophozoites (6-8% parasitaemia and 2% Hct)  
226 were incubated for 5 min with 1 mM DIAM or 10 mM DTT, respectively, blocked with 2 mM NEM  
227 and then magnetically enriched. Peroxide-induced effects on parasite oxidative status were monitored  
228 at concentrations ranging from 0.1  $\mu$ M to 1  $\mu$ M and at intervals between 10 min and 9 h, after which  
229 free thiol groups were blocked with 2 mM NEM and trophozoite infected RBCs were magnetically  
230 enriched (Figure 4, S6A and S6B).

231 Both OZ277 and OZ439 caused time- and concentration-dependent oxidation of the NF54*attB*<sup>[hGrx1-  
232 roGFP2]</sup> parasite cytosol in the CLSM and plate reader when tested at 300 nM for 1-9 h (Figure 4 and  
233 S6B). OZ277 at 300 nM increased the fluorescence ratio of NF54*attB*<sup>[hGrx1-roGFP2]</sup> parasites by 1.27-  
234 fold via plate reader (P-value < 0.01) (Figure 4E) and 2.25-fold via CLSM detection (Figure 4A, 4B  
235 and S6B) (P-value < 0.0001) within 3 h of drug treatment and oxidation peaked after 9 h (2.0-fold  
236 increase, P-value < 0.0001), when compared to the DMSO control. In contrast, OZ439 at 300 nM  
237 increased cytosolic oxidation after 6 h of exposure (1.3-fold increase via plate reader detection (P-  
238 value < 0.05) (Figure 4G), and 1.8-fold increase via CLSM detection (P-value < 0.0001)) (Figure 4A,  
239 4B and S6B), and had a less pronounced impact compared to OZ277 (2.0-fold) on the fluorescence  
240 ratio over a 9 h period (1.63-fold increase, P-value < 0.001), consistent with OZ439 having slower  
241 activity kinetics within the parasite<sup>32</sup>. A similar temporal increase in cytosolic oxidation was observed  
242 in parasites treated with 1  $\mu$ M of OZ277 or OZ439 (Figure 4F and H).

243 Surprisingly, DHA showed no significant effect on the fluorescence ratio of NF54*attB*<sup>[hGrx1-roGFP2]</sup>  
244 parasites in either the CLSM or plate reader when tested at 300 nM for 1, 3 or 6 h (Figure 4A, B, C, D  
245 and S6B). To rule out a concentration-dependent effect on the fluorescence ratio and the possibility  
246 that DHA induced a rapid oxidative change in the cytosol that quickly returned to basal levels, we



247 also tested DHA concentrations as high as 1  $\mu$ M (Figure 4D) and exposures as short as 10 min (100  
248 nM) (Figure S6A) in the plate reader assay. No significant change to the fluorescence ratio was  
249 detected with short DHA exposures or at a concentration up to 1  $\mu$ M (Figure 4C and 4D), suggesting  
250 that DHA had no effect on the cytosolic glutathione dependent redox ratio of NF54attB<sup>[hGrx1-roGFP2]</sup>  
251 parasites under these conditions.

252 As expected, treatment with 1 mM DIAM led to a significant increase of the fluorescence ratio of  
253 NF54attB<sup>[hGrx1-roGFP2]</sup> parasites with both the CLSM and plate reader, whereas there was no change in  
254 the fluorescence ratio after treatment with 10 mM DTT, when compared to the untreated control  
255 (Figure 4, S6A and S6B). This is consistent with the basal cytosolic environment of *P. falciparum*  
256 being strongly reducing<sup>54</sup>.

### 257 **Free thiol and glutathione levels in peroxide-treated *P. falciparum* infected RBCs**

258 To further interrogate peroxide-mediated changes to the intracellular redox milieu, we employed a  
259 thiol derivatisation targeted mass spectrometry-based metabolomics approach to accurately measure  
260 the abundance of small molecule thiols and related metabolites within peroxide-treated infected RBCs  
261 (*P. falciparum* 3D7 strain (Figure 5, S7A, and S7B)) (NF54attB<sup>[hGrx1-roGFP2]</sup> strain (Figure S7C)).  
262 Trophozoite-infected RBCs (30-34 h.p.i) at 6-8% parasitaemia and 2% Hct were treated with DHA  
263 (100 nM for 3 h), OZ277 (300 nM for 3 h) or OZ439 (300 nM for 6 h). Equivalent cultures treated  
264 with DIAM (1 mM for 5 min), DTT (10 mM for 5 min) or an equal volume of DMSO (6 h) acted as  
265 the oxidation, fully reduced and untreated control, respectively. Following the drug incubation, the  
266 cells were magnetically enriched and extracted with 50 mM NEM to rapidly and irreversibly  
267 derivatise thiol metabolites and protect them from oxidation during subsequent sample preparation,  
268 thus preserving their redox state (method 2) (Figure S7B). As the magnetic enrichment step could  
269 alter the cellular redox state prior to NEM stabilisation, we also performed the same drug treatments  
270 on magnetically purified cultures that were extracted and derivatised with NEM immediately after the  
271 drug incubation (method 3). NEM stabilisation was also performed after drug treatment and prior to  
272 the magnet enrichment step (method 1). In all cases, results were compared to DMSO-treated infected  
273 RBCs. For peroxide treatments performed on magnetically purified cultures, the activity of the  
274 peroxide antimalarials was confirmed to be in the expected nanomolar range for a 3 or 6 h pulse and  
275 the IC<sub>50</sub> values were equivalent in both 3D7 and NF54attB<sup>[hGrx1-roGFP2]</sup> parasites, confirming that the  
276 peroxides act similarly in both lines (Figure S7D).

277 In cultures immediately stabilised with NEM (method 3), the oxidant DIAM significantly depleted  
278 GSH (P-value < 0.05) and there was a corresponding increase in the levels of oxidised glutathione  
279 (GSSG) (P-value < 0.01), while the reductant DTT depleted GSSG only (Figure 5). This is consistent  
280 with DIAM causing an oxidative shift and DTT causing a reducing shift in the free cellular  
281 glutathione redox balance and agrees with the fluorescence ratio observed in DIAM- and DTT-treated

282 *NF54attB*<sup>[hGrx1-roGFP2]</sup> parasites (Figure 4). The glutathione precursor  $\gamma$ -glutamyl cysteine ( $\gamma$ -GluCys)  
283 was increased after DIAM (P-value < 0.01) and DTT (P-value < 0.0001) exposure, likely as a  
284 response to restore cellular glutathione levels via increased synthesis (Figure 5). However, cysteine  
285 (Cys) levels were not affected by DIAM treatment, but DTT treatment caused a significant increase in  
286 Cys levels (P-value < 0.0001) (Figure 5). This significant increase in Cys levels is likely a result of all  
287 cystine (the oxidized dimer of Cys) in the infected RBCs being converted to the reduced form (Cys).

288 Both OZ277 and OZ439 showed a trend towards depleted GSH levels (not significant), with GSSG  
289 levels being unaffected (Figure 5). The ozonides caused no detectable changes in Cys, or  $\gamma$ -GluCys  
290 levels. DHA treatment depleted the total pool of free glutathione and this included a significant  
291 decrease in reduced GSH (P-value < 0.01) and a trend towards decreased oxidised GSSG (1.5- and  
292 3.7-fold decrease, respectively) levels (Figure 5). Cys and  $\gamma$ -GluCys levels were unaffected by DHA  
293 treatment (Figure 5). Pyrimethamine, an antimalarial that targets the parasite's dihydrofolate reductase  
294 didn't affect the relative abundance of thiols in our assay (Figure 5). For most of the compounds  
295 tested, similar results were also observed with 3D7 cultures magnetically enriched and stabilised after  
296 drug treatment (method 1 and method 2, Figure S7A and B) and in the *NF54attB*<sup>[hGrx1-roGFP2]</sup> parasite  
297 strain (method 3, Figure S7C).

## 298 Discussion

299 Here, we have used click chemistry based chemical proteomics with an extensive control strategy to  
300 show that peroxide antimalarials based on artemisinin and ozonides target similar sets of proteins  
301 within *P. falciparum*, and that these proteins are involved in numerous essential biological processes.  
302 These findings agree with previous studies demonstrating that ozonides and artemisinins have a  
303 similar mode of action and that they disrupt multiple processes important for parasite survival<sup>20-23, 32</sup>.  
304 We also identified a set of proteins that were alkylated exclusively by specific peroxides. This  
305 suggests that there may be subtle differences in the underlying mechanisms by which artemisinins,  
306 first-generation ozonides and second-generation ozonides kill the malaria parasite, which could have  
307 important implications for ozonide cross-resistance with artemisinins.

308 Functional enrichment analysis of the peroxide antimalarial targets identified food vacuole proteins to  
309 be significantly enriched, consistent with this compartment being an important initial site of damage  
310 for peroxides<sup>32</sup>, as well as proteins involved in redox processes. Peroxide-induced perturbation of the  
311 parasite antioxidant defence system was then confirmed using 1) a parasite cytosolic-specific redox  
312 probe, which determined glutathione dependent redox state in real time, and 2) targeted LC-MS based  
313 thiol metabolomics, involving derivatisation of thiol metabolites with NEM, to accurately measure  
314 total parasite glutathione in both its reduced (GSH) and oxidised (GSSG) forms, and its precursors.

315 Previous studies using clickable artemisinin and ozonide probes to identify peroxide targets have  
316 demonstrated minimal overlap in proteins (25 in total)<sup>21, 23</sup>. When including the targets identified in  
317 our study, only 13 proteins were common between all three datasets (Figure S1). Further analysis of  
318 these 13 proteins identified them to all be highly abundant in the *P. falciparum* blood-stage proteome  
319 (Figure S1), with the exception of PF3D7\_0824600 (Fe-S cluster assembly protein DRE2). This  
320 minimal overlap could be due to random alkylation of proteins by the peroxides, as proposed by  
321 Jourdan *et al.*<sup>20</sup>. However, we identify a significant proportion of proteins from each of these studies  
322 individually (36% and 55%), which argues against this hypothesis. An alternative explanation is likely  
323 due to the type of mass spectrometry analysis, which in all previous studies utilised the data  
324 dependent acquisition approach (DDA). DDA selects precursor ions, corresponding to peptides, for  
325 fragmentation in the mass spectrometer based on their abundances, so only the most abundant  
326 peptides will produce fragment spectra, which are necessary for protein identification. In a complex  
327 sample, this data-dependent approach can lead to inconsistent peptide identification, which limits the  
328 number of proteins that can be reproducibly identified and quantified, often favouring highly  
329 abundant proteins<sup>56</sup>. In contrast, the mass spectrometry approach used in our study (DIA-MS), selects  
330 all precursor ions (peptides) within a mass window and fragments them regardless of their intensity<sup>57</sup>.  
331 This approach results in an extremely high run-to-run reproducibility and a more comprehensive  
332 dataset that is not biased towards highly abundant proteins. This is evident from our data, where we

333 have significantly expanded the list of peroxide targets by ~64 % and the identified proteins ranged in  
334 abundance across the *P. falciparum* blood stage proteome (Figure 1). The potential limitation of our  
335 DIA approach is the increased identification of low-abundance non-drug-specific proteins that bind to  
336 the agarose resin. However, this potential issue was overcome by the inclusion of an extensive set of  
337 six control conditions that accounted for any background binding. Overall, the analysis of a total of 36  
338 control samples, alongside the 23 samples from active alkyne-tagged peroxides, provides extremely  
339 high confidence in the protein targets identified in this study.

340 GO analysis of peroxide protein targets identified the food vacuole, and redox homeostasis, as the  
341 most significant cellular compartment, and biological process, to be enriched, respectively (Figure 3  
342 and Supplementary Data 2 and 3). Confirming that these proteins are important for the activity of  
343 peroxides, alkylation of these proteins with OZ727 was decreased in the presence of the non-clickable  
344 parent ozonide, OZ03, and following pre-treatment with the falcipain haemoglobinase inhibitor, E64d,  
345 which blocks peroxide activation (Figure S2 and S4). This also confirms that haem derived from  
346 haemoglobin digestion is the major iron source responsible for peroxide activation. The food vacuole  
347 is a site considered important for haem-dependent activation of peroxides, and protein targets  
348 functioning in the food vacuole were also shown to be enriched in previous peroxide mode of action  
349 studies<sup>21, 23</sup>. Furthermore, the haemoglobin digestion pathway within the food vacuole is known to be  
350 significantly perturbed following treatment with the peroxides<sup>32</sup>.

351 GO terms associated with general metabolic processes were also specifically enriched in peroxide-  
352 treated parasites and not the controls (Figure 3 and Supplementary Data 3). These enriched terms  
353 included glycolysis (GO:0006096), which is consistent with previous studies identifying glycolytic  
354 proteins as targets of peroxides<sup>21-23</sup>. However, our previous metabolomic analyses revealed the  
355 abundance of glycolysis metabolites<sup>32</sup> and flux through the glycolysis pathway<sup>58</sup> are unaffected by  
356 peroxide exposure. It is possible that a corresponding increase in the abundance of glycolytic  
357 proteins<sup>32</sup> compensates for the loss of enzyme function, raising questions as to the functional  
358 importance of these targets to the mechanism of action of peroxides.

359 The antioxidant system is essential within the parasite, not only for the maintenance of redox  
360 homeostasis, but also for the parasite's ability to respond to drug-induced stress<sup>59</sup>. During blood stage  
361 development, reactive oxygen species produced as a by-product of haemoglobin digestion induce  
362 intraparasitic oxidative stress, which the parasite manages by engaging a highly efficient antioxidant  
363 defence system<sup>59</sup>, which includes glutathione and thioredoxin-related proteins<sup>59</sup>. Parasite glutathione  
364 is crucial for maintaining redox balance and has been linked to various drug resistance mechanisms,  
365 including resistance against the antimalarial drug chloroquine<sup>59-60</sup> and more recently artemisinins<sup>61-62</sup>.  
366 As glutathione is the major intra-parasitic antioxidant, we used a parasite cytosolic expressed  
367 fluorescence-based glutathione biosensor, hGrx1-roGFP2, to monitor glutathione redox potential in

368 infected RBCs treated with various peroxide antimalarials. Interestingly, we found that the ozonides  
369 perturbed the parasite cytosolic redox ratio in a concentration- and time-dependent manner, while  
370 DHA had no measurable impact on the redox ratio. This was shown using both plate reader and  
371 microscopy (Figure 4), and was somewhat surprising considering the involvement of free radicals in  
372 the mode of action of artemisinins<sup>63-65</sup>. Interestingly, DHA was shown to increase the redox ratio in a  
373 time-dependent manner when the same probe was localised to the parasite mitochondria<sup>55, 61, 66-67</sup>,  
374 suggesting that artemisinins differentially affect the redox status of parasite organelles. We therefore,  
375 measured total glutathione, and its associated metabolites using a targeted LC-MS based  
376 metabolomics method, where we derivatised parasite thiols using NEM to capture the parasite redox  
377 state. Our redox analytical method demonstrated that peroxides generally had a trend towards  
378 depletion of total glutathione (GSH and GSSG), with DHA having the most profound effect,  
379 compared to control (Figure 5). DHA significantly depleted both the reduced (GSH) and oxidised  
380 (GSSG) forms of glutathione, which likely explains the lack of impact on the glutathione redox  
381 balance (based on the fluorescent biosensor), despite clear depletion of reduced glutathione as  
382 measured by LC-MS. In addition to its direct role in redox homeostasis, glutathione plays an  
383 important role in repair mechanisms for proteins that have undergone oxidative damage, in addition to  
384 potential roles in haem degradation and conjugation of small molecules. Whilst it is possible that  
385 glutathione is consumed by direct quenching of the artemisinin-derived radicals<sup>65</sup>, we propose that a  
386 significant amount of glutathione is consumed by the parasite's stress response<sup>32</sup> to this extensive  
387 protein alkylation (Figure 2).

388 The ozonides demonstrated significantly less depletion of total glutathione levels than DHA, which is  
389 consistent with the slower onset of activity of these drugs compared to DHA<sup>13</sup> and their temporal  
390 effects on parasite biochemical pathways<sup>32</sup>. However, the ozonides had a greater impact than DHA on  
391 the glutathione redox ratio (Figure 5), and all tested peroxides targeted several proteins involved in  
392 redox homeostasis (Figure 3), suggesting that glutathione metabolism plays a critical role in the mode  
393 of action of these two classes of peroxide antimalarials, albeit the specific role differs between  
394 classes<sup>31, 68-69</sup>. Supporting this hypothesis, pro-oxidant molecules are known to enhance the activity of  
395 artemisinins<sup>28</sup> and parasites with a mutant Kelch 13 propeller allele, linked to artemisinin resistance  
396 both *in vitro* and *in vivo*, have elevated glutathione levels<sup>62</sup>. Glutathione has also been associated with  
397 artemisinin sensitivity in other parasite lines<sup>70-72</sup> and we propose that glutathione metabolism may  
398 provide opportunities for intervention with pro-oxidant combinations to enhance peroxide sensitivity  
399 in the context of artemisinin resistance.<sup>73</sup>

400

401 We have demonstrated with chemical proteomics that peroxide antimalarials alkylate a range of  
402 *Plasmodium* proteins that are vital for parasite growth and survival. The parasite antioxidant system

403 was one of the crucial pathways targeted. Using genetically-encoded redox sensors and LCMS-based  
404 targeted thiol measurements, we showed that peroxide antimalarials cause significant disruption to *P.*  
405 *falciparum* glutathione metabolism. This detailed description of the protein targets of artemisinins and  
406 ozonides, and the important role of redox metabolism in their modes of action, will underpin future  
407 research to optimise their efficacy against increasingly common artemisinin resistant parasites.

## 408 **Methods**

### 409 ***P. falciparum* cell culture**

410 3D7 and the NF54attB<sup>[hGrx1-roGFP2]</sup> *P. falciparum* transgenic line<sup>49</sup> were cultured as previously  
411 described<sup>74</sup>. Parasites were tightly synchronised by double sorbitol lysis 14 h apart.

### 412 **Peroxide antimalarials and alkyne tagged peroxide probes**

413 DHA and artemisinin were purchased from Jomar Bioscience and Sigma-Aldrich, respectively.  
414 OZ277 and OZ439 were provided by the Medicines for Malaria Venture (Geneva). OZ03, the  
415 artemisinin alkyne, AA2, and ozonide alkynes, OZ727 and carbaOZ727, were obtained by previously  
416 published procedures<sup>20-21, 75</sup>. Synthesis of the alkyne ozonide OZ747, the click chemistry probe  
417 analogous to the advanced-stage antimalarial clinical candidate, OZ439 (artefenomel), is described  
418 below.

### 419 **Synthesis of OZ747**

420 ***cis*-6-(Pent-4-ynamido)adamantane-2-spiro-3'-8'-[4-(2-morpholinoethoxy)phenyl]-1',2',4'-**  
421 **trioxaspiro[4.5]decane mesylate (OZ747). Step 1.** To a solution of *cis*-6-oxoadamantane-2-spiro-3'-  
422 8'-(4-hydroxyphenyl)-1',2',4'-trioxaspiro[4.5]decane<sup>76</sup> (500 mg, 1.35 mmol) in dry DME (25 mL)  
423 were added powder NaOH (324 mg, 8.01 mmol) and Bu<sub>4</sub>NHSO<sub>4</sub> (93 mg, 0.50 mmol). The resulting  
424 mixture was stirred at rt for 30 min before addition of *N*-(2-chloroethyl)morpholine hydrochloride  
425 (415 mg, 2.22 mmol). The resulting reaction mixture was stirred at 60 °C for 12 h. After filtration of  
426 the solid material, the filtrate was concentrated in vacuo to afford a residue which was dissolved in  
427 EA (100 mL), washed with H<sub>2</sub>O (50 mL) and brine (50 mL), dried over MgSO<sub>4</sub>, and filtered and  
428 concentrated in vacuo to afford *cis*-6-oxoadamantane-2-spiro-3'-8'-[4-(2-morpholinoethoxy)phenyl]-  
429 1',2',4'-trioxaspiro[4.5]decane (560 mg, 86%) as a white solid. mp 145 – 146 °C. <sup>1</sup>H NMR (500 MHz,  
430 CDCl<sub>3</sub>) δ 1.67 – 1.75 (m, 2H), 1.84 – 1.92 (m, 4H), 1.94 (d, *J* = 13.0 Hz, 2H), 1.99 (d, *J* = 13.0 Hz,  
431 2H), 2.06 (d, *J* = 13.0 Hz, 2H), 2.15 (s, 2H), 2.26 (d, *J* = 13.0 Hz, 2H), 2.35 (d, *J* = 13.0 Hz, 2H), 2.50  
432 (m, 3H), 2.57 (s, 4H), 2.79 (t, *J* = 5.5 Hz, 2H), 3.73 (t, *J* = 4.5 Hz, 4H), 4.09 (t, *J* = 5.5 Hz, 2H), 6.84  
433 (d, *J* = 8.5 Hz, 2H), 7.12 (d, *J* = 8.5 Hz, 2H); <sup>13</sup>C NMR (125 MHz, CDCl<sub>3</sub>) δ 31.57, 34.62, 35.68,  
434 35.75, 35.90, 41.97, 44.72, 45.15, 54.09, 57.70, 65.82, 66.95, 109.04, 108.28, 114.53, 127.62, 138.30,  
435 157.16, 215.88. Anal. calcd for C<sub>28</sub>H<sub>37</sub>NO<sub>6</sub>: C, 69.54; H, 7.71; N, 2.90. Found: C, 70.00; H, 7.47; N,  
436 2.77. **Step 2.** Following the method of Wu et al.<sup>76</sup>, a one-pot reductive amination/acylation of *cis*-6-  
437 oxoadamantane-2-spiro-3'-8'-[4-(2-morpholinoethoxy)phenyl]-1',2',4'-trioxaspiro[4.5]decane (430 mg,  
438 0.89 mmol) afforded the free base of **OZ747** (170 mg, 34%). **Step 3.** To a solution of the free base of  
439 **OZ747** (170 mg, 0.30 mmol) in EA (5 mL) was added dropwise a solution of methanesulfonic acid  
440 (58 mg, 0.60 mmol) in diethyl ether (1 mL). The mixture was stirred at rt for 30 min, and the resulting  
441 solid was filtered, washed with cold EA, and dried in vacuo at 50 °C to afford **OZ747** as a white solid  
442 (157 mg, 79%). mp 151 – 152 °C. <sup>1</sup>H NMR (500 MHz, DMSO-*d*<sub>6</sub>) δ 9.91 (s, 1H), 7.84 (d, *J* = 7.3 Hz,



443 1H), 7.17 (d,  $J = 8.4$  Hz, 2H), 6.93 (d,  $J = 8.3$  Hz, 2H), 4.32 (t,  $J = 4.7$  Hz, 2H), 3.98 (dd,  $J = 12.9, 3.4$   
444 Hz, 2H), 3.77 (d,  $J = 7.0$  Hz, 1H), 3.71 (t,  $J = 12.5$  Hz, 2H), 3.61 – 3.53 (m, 2H), 3.50 (d,  $J = 12.5$  Hz,  
445 2H), 3.20 (q,  $J = 11.5$  Hz, 2H), 2.75 (s, 1H), 2.57 (t,  $J = 11.9$  Hz, 1H), 2.40 – 2.24 (m, 7H), 2.09 –  
446 1.62 (m, 17H), 1.55 (m, 3H);  $^{13}\text{C}$  NMR (125 MHz, DMSO- $d_6$ )  $\delta$  170.39, 156.30, 139.39, 128.04,  
447 115.16, 110.74, 108.70, 84.24, 71.74, 63.70, 62.43, 55.57, 52.48, 52.18, 41.17, 40.24, 35.50, 35.35,  
448 34.54, 34.51, 34.20, 31.75, 30.62, 30.22, 28.83, 28.78, 14.93. Anal. calcd for  $\text{C}_{34}\text{H}_{48}\text{N}_2\text{O}_9\text{S}$ : C, 61.80;  
449 H, 7.32; N, 4.24. Found: C, 61.56; H, 7.10; N 4.00.

#### 450 **Drug sensitivity assays**

451 Parasite growth inhibition assays with the peroxide antimalarials and the clickable alkyne tagged  
452 peroxide probes were performed as previously described<sup>12</sup>. Briefly, for clickable alkyne tagged  
453 peroxides (OZ727, OZ747, AA2 and carbaOZ727) and their associated non-clickable controls (OZ03,  
454 OZ277, OZ439, DHA and artemisinin),  $\text{IC}_{50}\text{s}$  were performed on *P. falciparum* (3D7) infected  
455 cultures at 1% parasitaemia and 2% haematocrit (Hct) in a 96 well plate over 48 h at 37 °C. For the  
456 non-clickable peroxides, OZ277, OZ439 and DHA, drug pulse assays were performed on both 3D7  
457 and NF54attB<sup>[hGrx1-roGFP2]</sup> *P. falciparum* lines that were magnet harvested (90% parasitemia) and  
458 adjusted to a final Hct of 0.12%. Following a drug pulse of 3 h for DHA and OZ277 and 6 h for  
459 OZ439, peroxides were washed off as previously described<sup>12</sup> with minor modification. Following four  
460 washes with 200  $\mu\text{L}$  of complete RPMI culture media containing 5% Albumax II, an extra wash with  
461 complete RPMI media was also included. After the washes, parasitaemia was adjusted to 0.6% and  
462 the Hct was returned to 2% using uninfected RBCs. Cultures were then transferred to a flat-bottom 96  
463 well microplate and incubated at 37 °C for 48 h. Following the 48 h incubation, parasite drug  
464 susceptibility was assessed by measurement of SYBR green I fluorescence as previously described<sup>12</sup>.  
465 The data was analysed using GraphPad Prism software version 8.0.2 as previously described<sup>12</sup>.

#### 466 **Parasite treatment for chemical proteomics**

467 *P. falciparum* parasites (3D7) synchronised to the trophozoite stage (28-32 h post invasion (h.p.i))  
468 were diluted to 10% parasitaemia and adjusted to 2% Hct. For each treatment condition, 30 mL of  
469 infected RBC culture was used. Cultures were treated with 300 nM of the active clickable peroxides  
470 AA2, OZ727 or OZ747 for 1 to 6 h. Control cultures were incubated with 300 nM of the inactive  
471 (clickable) non-peroxide probe, carbaOZ727 (1 h), 300 nM of the non-clickable parent ozonide, OZ03  
472 (1, 3 and 6 h), or an equivalent volume of DMSO (1 h, < 0.01% final concentration). For competition  
473 experiments, the cultures were treated together with 300 nM of OZ727 and either an equivalent (300  
474 nM) or excessive (900 nM) concentration of OZ03 for 1 h. In experiments using the cysteine protease  
475 inhibitor E64d to antagonise peroxide activity, cultures were pre-treated for 30 min with 10  $\mu\text{M}$  of  
476 E64d, followed by incubation with OZ727 for an additional 1 h. For all experiments, cultures were

477 maintained at 37 °C under a gas atmosphere of 94% N<sub>2</sub>, 5% CO<sub>2</sub> and 1% O<sub>2</sub> for the duration of drug  
478 exposure.

479 After incubation with the alkyne probes, all subsequent steps were performed on ice or at 4 °C. The  
480 cultures were centrifuged at 700 g for 3 min to remove the media and parasites were isolated from the  
481 RBC by incubating with 0.1% saponin in PBS containing protease (Roche) and phosphatase inhibitors  
482 (Sigma, 20 mM sodium fluoride, 0.1mM sodium orthovanadate and 10 mM beta glycerophosphate)  
483 for 10 min. The cell lysates were then centrifuged at 2,576 x g to remove RBC proteins and the  
484 resulting parasite pellets were washed a further three times in PBS containing protease and  
485 phosphatase inhibitors to ensure removal of RBC membrane debris. Parasite pellets were stored at -80  
486 °C until protein extraction and click chemistry enrichment of probe labelled proteins.

#### 487 **Copper catalysed click chemistry enrichment of alkylated proteins**

488 Proteins were extracted by solubilising parasite proteins using 0.5% sodium deoxycholate (SDC) in  
489 100 mM HEPES buffer and heating each sample at 90 °C for 5 min. This was followed by 3 x 30 sec  
490 cycles of probe sonication on ice. The soluble fraction was separated by centrifugation at 14,800 x g  
491 for 5 min and the protein concentration determined using the Pierce BCA assay kit (Thermo  
492 Scientific™ Pierce™). The protein concentration of each sample was adjusted to 693 µg/mL. Alkyne  
493 labelled proteins were enriched and affinity purified by direct attachment to azide agarose beads (Jena  
494 Bioscience) using copper catalysed click chemistry. For each reaction, 50 µL of azide agarose beads  
495 (prewashed with 1,400 µL of Milli-Q water), 22.6 µL of TCEP (50 mM in Milli-Q water), 68 µL of  
496 THPTA ligand (1.7 mM in DMSO/*t*-butanol, 1:4 ratio) and 22.6 µL of CuSO<sub>4</sub> (50 mM in Milli-Q  
497 water) were sequentially added to 837 µL of the cell lysate. The lysate was incubated at room  
498 temperature for 1 h while rotating end-over-end. Following the click reaction, the agarose resins  
499 containing the clicked proteins were washed with 1 mL of Milli-Q water.

#### 500 **Washing and on-bead digestion of clicked proteins**

501 The washed resins with the clicked proteins attached were resuspended in 1 mL of agarose wash  
502 buffer (100 mM HEPES, 1% SDS, 250 mM NaCl, 5 mM EDTA, pH 8). Samples were reduced by  
503 addition of 10 µL of 1 M DTT and heated at 70 °C for 15 min, before being allowed to cool for a  
504 further 15 min. The supernatant was then removed by centrifugation at 4000 g for 5 min and the  
505 samples were alkylated in the dark with 40 mM iodoacetamide in 1 mL of agarose wash buffer for 30  
506 min at room temperature. The beads were then extensively washed five times with agarose wash  
507 buffer, five times with 8 M urea and a further 5 times with 20% acetonitrile (ACN). Between each  
508 wash, samples were centrifuged at 4000 g for 3 min. Following the final wash, the resins were  
509 resuspended in 500 µL of digestion buffer (100 mM HEPES, 2 mM CaCl<sub>2</sub>, 10% ACN) and the  
510 contents were transferred to a fresh tube. The tube was rinsed with a further 500 µL of digestion  
511 buffer and this was transferred to the same fresh tube. The resins were then pelleted by centrifugation

512 at 4000 g for 5 min and ~800  $\mu$ L of supernatant was removed. On-bead protein digestion was  
513 performed by adding 1  $\mu$ g of sequencing grade trypsin (Promega) to the samples, which were  
514 incubated overnight at 37 °C while spinning end-over-end. On the following day, the beads were  
515 separated from the digested peptides by centrifuging the samples at 4000 g for 5 min and supernatant  
516 transferred to a clean tube. The resins were briefly vortexed and washed with a further 500  $\mu$ L of  
517 Milli-Q water, which was then transferred to the same clean tube containing the digested peptides.  
518 Each sample was made up to 1 mL volume with Milli-Q water and acidified by addition of 2  $\mu$ L of  
519 formic acid. The samples were then desalted using in-house generated StageTips<sup>77</sup>, dried and  
520 resuspended in 10  $\mu$ L of 2% ACN and 0.1% formic acid containing indexed retention time (RT)  
521 peptides for LCMS/MS analysis.

#### 522 **Liquid chromatography mass spectrometry (LC-MS/MS) analysis**

523 Proteomics LC-MS/MS data was acquired using Dionex Ultimate® 3000 RSLCnano system coupled  
524 to Q Exactive HF mass spectrometer (Thermo Scientific) carried out as described previously<sup>78</sup>, with  
525 minor modifications. MS2 data was collected in data independent mode (DIA) with a 33-fixed  
526 window setup of 18  $m/z$  effective precursor isolation over the  $m/z$  range of 375-975 Da.

#### 527 **Chemical proteomics data analysis**

528 Raw files were processed using Spectronaut<sup>TM</sup> 13.0 against an in-house generated asexual *P.*  
529 *falciparum* spectral library. The library contained 44 449 peptides corresponding to 4730 proteins, of  
530 which 3113 were *P. falciparum* proteins<sup>78</sup>. For processing, raw files were loaded and Spectronaut  
531 calculated the ideal mass tolerances for data extraction and scoring based on extensive mass  
532 calibration using a correction factor of one. Both at the precursor and fragment levels, the highest  
533 datapoint within the selected  $m/z$  tolerance was chosen for targeted data extraction. Identification of  
534 peptides against the library was based on the default Spectronaut settings (Manual for Spectronaut  
535 13.0, available on Biognosis website). Briefly, the Q-value cut-off at the precursor and protein levels  
536 were set at 1%, therefore only those that passed this threshold were considered as identified and used  
537 for other subsequent processes. RT prediction type was set to dynamic indexed RT. Interference  
538 correction was on MS2 level. For quantification, the interference correction was activated and a  
539 significance filter of 0.01 was used for Q-value filtering with the Q-value sparse setting applied. The  
540 imputing strategy was set to no imputing.

541 Identified proteins in the OZ727 and OZ747 groups with a fold-change  $\geq 2$  compared to the DMSO,  
542 carbaOZ727 and time-matched OZ03 controls, and with a p-value  $< 0.05$  (Mann-Whitney *U* test)  
543 compared to carbaOZ727, were considered as protein targets. The same thresholds were applied to  
544 proteins in the AA2 group, except p-value filtering was based on comparison with the DMSO control.

545 The identified protein targets for OZ727, OZ747 and AA2 were subjected to gene ontology (GO)  
546 enrichment analysis with topGO<sup>79</sup>. PlasmoDB GO terms were used for GO terms mapping and the  
547 elim algorithm was applied to navigate the topology of the GO graph<sup>80</sup>. The Fisher exact test was  
548 used for testing enrichment of GO terms. *P. falciparum* proteins from the in-house spectral library  
549 were used as the genomic background for statistical testing, and GO terms represented by fewer than  
550 five proteins in this library were excluded from the analysis. Significantly enriched GO terms ( $p <$   
551  $0.05$  and enrichment  $> 1.5$ -fold) were visualised in Cytoscape 3.6 and manually clustered based on the  
552 protein targets shared between GO terms and the semantic similarity measure of Schlicker *et al.*<sup>81</sup>.

553 The mass spectrometry proteomics data have been deposited to the ProteomeXchange Consortium via  
554 the PRIDE<sup>82</sup> partner repository with the data set identifier PXD027334. [Reviewer account details are  
555 username: reviewer\_pxd027334@ebi.ac.uk and password: 5XhN5Wjo]

### 556 ***In vitro* interaction of peroxide antimalarials with the hGrx1-roGFP2 recombinant protein**

557 *In vitro* measurements with the recombinant hGrx1-roGFP2 redox sensor were carried out as  
558 previously described<sup>49, 54-55</sup>. Peroxides, diamide (DIAM) and dithiothreitol (DTT) were diluted with a  
559 degassed reaction buffer (100 mM potassium phosphate, 1 mM ethylenediaminetetraacetic acid,  
560 EDTA, pH 7.0) and used immediately. Purified recombinant protein was prepared as previously  
561 described<sup>49, 55</sup> and diluted in reaction buffer to a concentration of 1.25  $\mu$ M, so that in the plate assay,  
562 the final concentration is 1  $\mu$ M. Peroxides at different concentrations combined with DIAM and DTT  
563 in the presence of iron (II) chloride (Sigma) (8.7 mM final concentration) were mixed with hGrx1-  
564 roGFP2 in a 96-well plate (black,  $\mu$ Clear TC Greiner Bio-One). The emission at 510 nm after  
565 excitation at 405 and 480 nm was measured after 5 min, 30 min, 1, 3, 5, and 10 h in a plate reader  
566 with optimal reading settings. Data from two independent experiments with two technical replicates  
567 were analysed for each concentration.

### 568 **Effects of the peroxides and other antimalarial drugs on redox homeostasis**

569 The effect of peroxides on *P. falciparum* redox homeostasis was investigated on late trophozoites (30-  
570 34 h.p.i) using the NF54attB<sup>[hGrx1-roGFP2]</sup> parasite line and were carried out as previously described<sup>49</sup>.  
571 Briefly, parasites (8% parasitaemia, 2% Hct) were incubated with 0.1 to 1  $\mu$ M of each peroxide  
572 antimalarial for 10 min to 9 h, depending on the compound. Following the appropriate incubation  
573 period, free thiol groups were blocked with 2 mM *N*-ethylmaleimide (NEM) for 15 min at 37 °C.  
574 After incubation with NEM, the infected RBC cultures were washed and resuspended in Ringer's  
575 solution. Resuspended cells were then magnetically enriched (80% parasitaemia) (Miltenyi Biotech,  
576 Bergisch Gladbach, Germany) and the parasite redox ratio was measured using either the confocal  
577 live-cell imaging or plate reader analyses. All peroxide incubation experiments included an untreated  
578 control group ("mock-treated" with DMSO for 9 h), as well as controls for complete oxidation (1 mM  
579 DIAM for 5 min) and complete reduction (10 mM DTT for 5 min).

## 580 **Confocal live-cell imaging and image processing**

581 Live-cell imaging was performed as previously described<sup>49</sup>. Briefly, drug-treated cells that had been  
582 magnet harvested and resuspended in pre-warmed Ringer's solution were seeded onto poly-L-lysine-  
583 coated flat  $\mu$ -slides VI (Ibidi, Martinsried, Germany). The probes were excited at 405 and 488 nm and  
584 emissions were detected at 500-550 nm. Images were analysed with a custom written macro in the Fiji  
585 distribution of ImageJ<sup>83</sup>. The macro was as follows: Region of interest (ROIs) of the cells were  
586 generated by applying a gaussian blur (sigma=4), generating a binary image and applying a binary  
587 watershed. 32-bit ratio images were generated by dividing the two fluorescent channels. The ROIs  
588 were used to measure the fluorescent intensity ratio in each cell. Images of the analysed cells were  
589 saved out and manually curated to select only infected RBCs that showed fluorescent signals at both  
590 405 and 488 nm excitation and had an intact host cell. The 405/488 nm ratios were calculated and  
591 graphs were plotted using GraphPad Prism 8.0.2 software. One-way ANOVA was applied for  
592 statistical analysis of significance (\*\*\*\*,  $p < 0.0001$ ).

## 593 **Plate reader analyses of redox homeostasis**

594 Plate reader analyses were performed as previously described<sup>49</sup>. Briefly, magnet harvested drug-  
595 treated NF54attB<sup>[hGrx1-roGFP2]</sup> parasites (80% parasitaemia) with their free thiols blocked by NEM were  
596 counted using the improved Neubauer hemocytometer (Brand GmbH, Wertheim, Germany) and  
597 adjusted to  $2.0 \times 10^5$  iRBCs/ $\mu$ L. Parasites (20  $\mu$ L) were transferred to 384-well plate and emission  
598 (530 nm) was measured with excitation wavelengths of 400 and 482 nm using a Clariostar plate  
599 reader (multi-chromatic) (BMG Labtech, Ortenberg, Germany). The calculated ratio of 400/482 nm  
600 was then plotted using GraphPad Prism 8.0.2 software. One-way ANOVA was applied for statistical  
601 analysis of significance (\*,  $p < 0.05$ ; \*\*,  $p < 0.01$ ; \*\*\*,  $p < 0.001$ ; \*\*\*\*,  $p < 0.0001$ ).

## 602 **LC-MS determination of free thiol and glutathione levels in peroxide-treated *P. falciparum*** 603 **infected RBCs**

604 Levels of reduced glutathione (GSH) and other thiol metabolites were determined by LC-MS for 3D7  
605 and NF54attB<sup>[hGrx1-roGFP2]</sup> *P. falciparum* parasites following treatment with peroxides. Samples were  
606 prepared via several different methodologies to obtain the most reproducible output and ensure that no  
607 major experimental artefacts were introduced during the sample processing. For simplicity, these are  
608 referred as method 1, 2 and 3. The results from method 3 are reported in the main manuscript (Figure  
609 5), while the results from methods 1 and 2 are shown in the supplementary material (Figure S7).

610 Method 1 sample preparation was the same as experiments used to measure the parasite redox ratio.  
611 Briefly, infected RBC cultures were incubated with the test compounds for the desired period (100  
612 nM DHA for 3 h, 300 nM OZ277 for 3 h, 300 nM OZ439 for 6 h, 1 mM DIAM for 5 min and DMSO  
613 for 6 h) and thiols were quenched by adding freshly prepared NEM solution to the final concentration

614 of 2 mM in culture media. The cultures were then magnet harvested and the parasitemia for each  
615 condition was adjusted to be 80%. The cells ( $5 \times 10^7$ ) were pelleted by centrifugation for 5 min at  
616 1000 g and the supernatant was removed. The cells were then washed with PBS, prior to addition of  
617 100  $\mu$ L ice cold methanol for extraction of thiols.

618 For method 2 sample preparation, the initial sample preparation was the same as described for method  
619 1, except that NEM was added to the extraction solvent (50  $\mu$ L of 50 mM NEM in 80% methanol,  
620 20% 10 mM ammonium formate, pH 7.0 and 50  $\mu$ L of 100% ACN). Therefore, free thiols were  
621 derivatised at the extraction step.

622 For method 3, magnetically enriched cultures at 90% parasitaemia and 0.12% Hct were incubated  
623 with the test compounds for the desired times (drug treatments, 100 nM DHA for 3 h, 300 nM OZ277  
624 for 3 h, 300 nM OZ439 for 6 h, 1  $\mu$ M pyrimethamine for 5 h, and three control conditions, 1 mM  
625 DIAM for 5 min, 10 mM DTT for 5 min and DMSO for 6 h). Following the drug incubation, cells  
626 were washed with PBS and  $5 \times 10^7$  cells were used for thiol metabolite extraction. Thiols were  
627 extracted using NEM-containing extraction solvent (50  $\mu$ L of 50 mM NEM in 80% methanol, 20% 10  
628 mM ammonium formate, pH 7.0 and 50  $\mu$ L of 100% ACN).

629 For all methods, following thiol extraction with the appropriate solvent, cells were incubated on a  
630 shaker for 1 h at 4 °C and then centrifuged at 20,000 g to remove insoluble material. Supernatants  
631 were transferred to glass HPLC vials and stored at -80 °C until analysis.

### 632 **LC-MS thiol analysis and data processing**

633 LC-MS data was acquired on a Q-Exactive Orbitrap mass spectrometer (Thermo Scientific, Waltham,  
634 Massachusetts, United States) coupled with a Dionex Ultimate® 3000 RS (Thermo Scientific) HPLC  
635 system. The method was adapted from previously described procedure<sup>84,85</sup> with some changes.  
636 Chromatographic separation was performed on Poroshel Infinity HILIC-Z column (2.7  $\mu$ m, 2.1  $\times$  100  
637 mm, Agilent Technologies) kept at 25°C. The total run time was 20 min at 0.3 ml/min flowrate with  
638 an injection volume of 10  $\mu$ L. Buffer A was 20 mM ammonium carbonate, buffer B was acetonitrile,  
639 syringe wash solvent was 50% isopropanol. Gradient started 90% B, decreased to 65% B at 10 min,  
640 further decreased to 20% B at 11.5 min, kept at 20% B until 13 min, returned to 90% B at 14 min and  
641 kept at 90% B until 20 min. HESI ion source parameters were as follows: sheath gas 50, aux gas 20  
642 and sweep gas 2 arbitrary units, spray voltage was set to 4.0 kV, capillary temperature to 300 °C, S-  
643 Lens RF level to 50 and auxiliary gas heater temperature to 120 °C. The mass spectrometer was  
644 operated in full scan mode in positive detection mode at 35 000 resolution at 200 m/z with detection  
645 range of 85 to 1275 m/z. The samples were analysed as a single batch to reduce batch-to-batch  
646 variation and randomised to account for LC-MS system drift over time.

647 Data was processed using peak areas, which were obtained with QuanBrowser (Thermo Scientific)  
648 software, version 4.2 by integrating MS1 peaks. Peak identities were then confirmed using NEM  
649 derivatised authentic standards. The calculated peak area was plotted using GraphPad Prism 8.0.2  
650 software and one-way ANOVA was applied for statistical analysis (\*,  $p < 0.05$ ; \*\*,  $p < 0.01$ ; \*\*\*,  $p <$   
651  $0.001$ ; \*\*\*\*,  $p < 0.0001$ ).



652 **Ancillary Information**

653 *Supporting Information*

654 Comparison of pulldown results with previously published datasets; heatmap representation of the  
655 effect of OZ03 co-incubation or E64d pre-treatment on OZ727 labelling of food vacuole proteins  
656 (GO:0020020); GO biological process enrichment analysis of control dataset; alkylation of redox  
657 homeostasis proteins (GO:0045454) by peroxide probes and effect of OZ03 co-incubation or E64d  
658 pre-treatment on OZ727 labelling of redox homeostasis proteins; effects of peroxide antimalarial on  
659 reduced hGrx1-roGFP2; effect of peroxide antimalarials on the redox ratio of *P. falciparum*  
660 NF54attB<sup>[hGrx1-roGFP2]</sup> parasites; effect on thiols (using different sample preparation methods) and  
661 activity of peroxide antimalarials in *P. falciparum* 3D7 and NF54attB<sup>[hGrx1-roGFP2]</sup> parasites  
662 Supplementary Data 1. Complete proteomics dataset for identification of protein targets of peroxide  
663 antimalarials and heatmap representation of all protein binding targets of OZ727, OZ747 and AA2  
664 following treatment of *P. falciparum* infected RBCs for 1 hr (all 300 nM) with protein IDs and  
665 significant proteins (+)  
666 Supplementary Data 2. GO enrichment analysis results for cellular component  
667 Supplementary Data 3. GO enrichment analysis results for biological process

668

669 *Acknowledgment:*

670 Funding support was provided by the NHMRC (APP#1160705, APP1128003, APP1185354 and  
671 APP1148700) and the NIH (AI116723-01). The authors acknowledge the Monash Proteomics and  
672 Metabolomics Facility (Parkville Node) for providing LC-MS technical assistance. The Australian  
673 Red Cross Blood Service in Melbourne donated human red blood cells for *in vitro* parasite cultivation.

674

675 *Author Contributions:*

676 DJC, KB, GS and CG directed the overall research program; GS, CG, ADP, AKS, KCH, DA  
677 performed the experiments; GS, CG, ADP, TGB, and CAM analysed the data and prepared figures;  
678 JW, XW, YD and JLV made the click chemistry probes, all authors contributed to experimental  
679 design and wrote and edited the manuscript.

680

681 *Abbreviations Used:* ACN, acetonitrile; ACTs, artemisinin-based combination therapies; Cys,  
682 cysteine; DHA, dihydroartemisinin; DIAM, diamide; DIA-MS, data independent acquisition mass  
683 spectrometry; DDA, data dependent analysis, DMSO, dimethylsulfoxide; DTT, Dithiothreitol; GO,  
684 gene ontology; GSH, reduced glutathione; GSSG, oxidised glutathione; h, hour; Hct, haematocrit;

685 hGrx-1-roGFP2, glutaredoxin 1 fused to a reduction-oxidation sensitive GFP; IC<sub>50</sub>, 50% inhibition  
686 concentration; iRT, indexed retention time; LC-MS, liquid chromatography-mass spectrometry, m/z,  
687 mass to charge ratio; mM, millimolar; NEM, *N*-ethylmaleimide; PBS, phosphate-buffered saline; *P.*  
688 *falciparum*, *Plasmodium falciparum*; RBCs, red blood cells; SDC, sodium deoxycholate;  $\gamma$ -GluCys,  $\gamma$ -  
689 glutamyl cysteine;  $\mu$ L, microlitre;  $\mu$ M, micromolar.

## 690 References

- 691 1. WHO *World Malaria Report 2020*; World Health Organisation: Geneva, 2020.
- 692 2. O'Neill, P. M.; Barton, V. E.; Ward, S. A., The molecular mechanism of action of  
693 artemisinin—the debate continues. *Molecules* **2010**, *15* (3), 1705-1721. DOI:  
694 10.3390/molecules15031705.
- 695 3. Woodrow, C. J.; Haynes, R. K.; Krishna, S., Artemisinins. *Postgrad. Med. J.* **2005**, *81* (952),  
696 71-78. DOI: 10.1136/pgmj.2004.028399.
- 697 4. Morris, C. A.; Duparc, S.; Borghini-Fuhrer, I.; Jung, D.; Shin, C.-S.; Fleckenstein, L., Review  
698 of the clinical pharmacokinetics of artesunate and its active metabolite dihydroartemisinin following  
699 intravenous, intramuscular, oral or rectal administration. *Malar. J.* **2011**, *10* (1), 263. DOI:  
700 10.1186/1475-2875-10-263.
- 701 5. Vennerstrom, J. L.; Arbe-Barnes, S.; Brun, R.; Charman, S. A.; Chiu, F. C.; Chollet, J.; Dong,  
702 Y.; Dorn, A.; Hunziker, D.; Matile, H.; McIntosh, K.; Padmanilayam, M.; Santo Tomas, J.; Scheurer,  
703 C.; Scorneaux, B.; Tang, Y.; Urwyler, H.; Wittlin, S.; Charman, W. N., Identification of an  
704 antimalarial synthetic trioxolane drug development candidate. *Nature* **2004**, *430* (7002), 900-904.  
705 DOI: 10.1038/nature02779.
- 706 6. Charman, S. A.; Arbe-Barnes, S.; Bathurst, I. C.; Brun, R.; Campbell, M.; Charman, W. N.;  
707 Chiu, F. C.; Chollet, J.; Craft, J. C.; Creek, D. J.; Dong, Y.; Matile, H.; Maurer, M.; Morizzi, J.;  
708 Nguyen, T.; Papastogiannidis, P.; Scheurer, C.; Shackelford, D. M.; Sriraghavan, K.; Stingelin, L.;  
709 Tang, Y.; Urwyler, H.; Wang, X.; White, K. L.; Wittlin, S.; Zhou, L.; Vennerstrom, J. L., Synthetic  
710 ozonide drug candidate OZ439 offers new hope for a single-dose cure of uncomplicated malaria.  
711 *Proc. Natl. Acad. Sci. U. S. A.* **2011**, *108* (11), 4400-4405. DOI: 10.1073/pnas.1015762108.
- 712 7. Dong, Y.; Wang, X.; Kamaraj, S.; Bulbule, V. J.; Chiu, F. C. K.; Chollet, J.; Dhanasekaran,  
713 M.; Hein, C. D.; Papastogiannidis, P.; Morizzi, J.; Shackelford, D. M.; Barker, H.; Ryan, E.; Scheurer,  
714 C.; Tang, Y.; Zhao, Q.; Zhou, L.; White, K. L.; Urwyler, H.; Charman, W. N.; Matile, H.; Wittlin, S.;  
715 Charman, S. A.; Vennerstrom, J. L., Structure–activity relationship of the antimalarial ozonide  
716 artefenomel (OZ439). *J. Med. Chem.* **2017**, *60* (7), 2654-2668. DOI: 10.1021/acs.jmedchem.6b01586.
- 717 8. Phyo, A. P.; Jittamala, P.; Nosten, F. H.; Pukrittayakamee, S.; Imwong, M.; White, N. J.;  
718 Duparc, S.; Macintyre, F.; Baker, M.; Möhrle, J. J., Antimalarial activity of artefenomel (OZ439), a  
719 novel synthetic antimalarial endoperoxide, in patients with *Plasmodium falciparum* and *Plasmodium*  
720 *vivax* malaria: an open-label phase 2 trial. *Lancet Infect. Dis.* **2016**, *16* (1), 61-69. DOI:  
721 10.1016/S1473-3099(15)00320-5.
- 722 9. Moehrle, J. J.; Duparc, S.; Siethoff, C.; van Giersbergen, P. L.; Craft, J. C.; Arbe-Barnes, S.;  
723 Charman, S. A.; Gutierrez, M.; Wittlin, S.; Vennerstrom, J. L., First-in-man safety and  
724 pharmacokinetics of synthetic ozonide OZ439 demonstrates an improved exposure profile relative to  
725 other peroxide antimalarials. *Br. J. Clin. Pharmacol.* **2013**, *75* (2), 524-537. DOI: 10.1111/j.1365-  
726 2125.2012.04368.x.
- 727 10. Kaiser, M.; Wittlin, S.; Nehrbass-Stuedli, A.; Dong, Y.; Wang, X.; Hemphill, A.; Matile, H.;  
728 Brun, R.; Vennerstrom, J. L., Peroxide bond-dependent antiplasmodial specificity of artemisinin and  
729 OZ277 (RBx11160). *Antimicrob. Agents Chemother.* **2007**, *51* (8), 2991-2993.
- 730 11. Fügi, M. A.; Wittlin, S.; Dong, Y.; Vennerstrom, J. L., Probing the antimalarial mechanism of  
731 artemisinin and OZ277 (arterolane) with nonperoxidic isosteres and nitroxyl radicals. *Antimicrob.*  
732 *Agents Chemother.* **2010**, *54* (3), 1042-1046. DOI: 10.1128/AAC.01305-09.
- 733 12. Giannangelo, C.; Stingelin, L.; Yang, T.; Tilley, L.; Charman, S. A.; Creek, D. J., Parasite-  
734 mediated degradation of synthetic ozonide antimalarials impacts *in vitro* antimalarial activity.  
735 *Antimicrob. Agents Chemother.* **2018**, *62* (3), e01566-01517. DOI: 10.1128/aac.01566-17.
- 736 13. Yang, T.; Xie, S. C.; Cao, P.; Giannangelo, C.; McCaw, J.; Creek, D. J.; Charman, S. A.;  
737 Klonis, N.; Tilley, L., Comparison of the exposure time-dependence of the activities of synthetic  
738 ozonide antimalarials and dihydroartemisinin against K13 wild-type and mutant *Plasmodium*  
739 *falciparum* strains. *Antimicrob. Agents Chemother.* **2016**, *60* (8), 4501-4510. DOI:  
740 10.1128/AAC.00574-16.
- 741 14. Meshnick, S. R.; Thomas, A.; Ranz, A.; Xu, C. M.; Pan, H. Z., Artemisinin (qinghaosu): the  
742 role of intracellular hemin in its mechanism of antimalarial action. *Mol. Biochem. Parasitol.* **1991**, *49*  
743 (2), 181-189. DOI: 10.1016/0166-6851(91)90062-B.

- 744 15. Meshnick, S. R.; Yang, Y. Z.; Lima, V.; Kuypers, F.; Kamchonwongpaisan, S.; Yuthavong,  
745 Y., Iron-dependent free radical generation from the antimalarial agent artemisinin (qinghaosu).  
746 *Antimicrob. Agents Chemother.* **1993**, *37* (5), 1108-1114. DOI: 10.1128/aac.37.5.1108.
- 747 16. Tang, Y.; Dong, Y.; Wang, X.; Sriraghavan, K.; Wood, J. K.; Vennerstrom, J. L., Dispiro-  
748 1,2,4-trioxane analogues of a prototype dispiro-1,2,4-trioxolane: mechanistic comparators for  
749 artemisinin in the context of reaction pathways with iron(II). *J. Org. Chem.* **2005**, *70* (13), 5103-5110.  
750 DOI: 10.1021/jo050385+.
- 751 17. Giannangelo, C.; Anderson, D.; Wang, X.; Vennerstrom, J. L.; Charman, S. A.; Creek, D. J.,  
752 Ozonide antimalarials alkylate heme in the malaria parasite *Plasmodium falciparum*. *ACS Infect. Dis.*  
753 **2019**, *5* (12), 2076-2086. DOI: 10.1021/acscinfecdis.9b00257.
- 754 18. Robert, A.; Benoit-Vical, F.; Claparols, C.; Meunier, B., The antimalarial drug artemisinin  
755 alkylates heme in infected mice. *Proc. Natl. Acad. Sci. U. S. A.* **2005**, *102* (38), 13676-13680. DOI:  
756 10.1073/pnas.0500972102.
- 757 19. Jourdan, J.; Matile, H.; Reift, E.; Biehlmaier, O.; Dong, Y.; Wang, X.; Mäser, P.;  
758 Vennerstrom, J. L.; Wittlin, S., Monoclonal antibodies that recognize the alkylation signature of  
759 antimalarial ozonides OZ277 (arterolane) and OZ439 (artefenomel). *ACS Infect. Dis.* **2015**, *2* (1), 54-  
760 61. DOI: 10.1021/acscinfecdis.5b00090.
- 761 20. Jourdan, J.; Walz, A.; Matile, H.; Schmidt, A.; Wu, J.; Wang, X.; Dong, Y.; Vennerstrom, J.  
762 L.; Schmidt, R. S.; Wittlin, S.; Mäser, P., Stochastic protein alkylation by antimalarial peroxides. *ACS*  
763 *Infectious Diseases* **2019**. DOI: 10.1021/acscinfecdis.9b00264.
- 764 21. Ismail, H. M.; Barton, V.; Phanchana, M.; Charoensutthivarakul, S.; Wong, M. H. L.;  
765 Hemingway, J.; Biagini, G. A.; O'Neill, P. M.; Ward, S. A., Artemisinin activity-based probes  
766 identify multiple molecular targets within the asexual stage of the malaria parasites *Plasmodium*  
767 *falciparum* 3D7. *Proc. Natl. Acad. Sci. U. S. A.* **2016**, *113* (8), 2080-2085. DOI:  
768 10.1073/pnas.1600459113.
- 769 22. Ismail, H. M.; Barton, V. E.; Panchana, M.; Charoensutthivarakul, S.; Biagini, G. A.; Ward,  
770 S. A.; O'Neill, P. M., A click chemistry-based proteomic approach reveals that 1, 2, 4-trioxolane  
771 and artemisinin antimalarials share a common protein alkylation profile. *Angew. Chem., Int. Ed.* **2016**,  
772 *55* (36), 6401-6405. DOI: 10.1002/anie.201512062.
- 773 23. Wang, J.; Zhang, C.-J.; Chia, W. N.; Loh, C. C.; Li, Z.; Lee, Y. M.; He, Y.; Yuan, L.-X.; Lim,  
774 T. K.; Liu, M.; Liew, C. X.; Lee, Y. Q.; Zhang, J.; Lu, N.; Lim, C. T.; Hua, Z.-C.; Liu, B.; Shen, H.-  
775 M.; Tan, K. S. W.; Lin, Q., Haem-activated promiscuous targeting of artemisinin in *Plasmodium*  
776 *falciparum*. *Nat. Commun.* **2015**, *6*, 10111. DOI: 10.1038/ncomms10111.
- 777 24. Bridgford, J. L.; Xie, S. C.; Cobbold, S. A.; Pasaje, C. F. A.; Herrmann, S.; Yang, T.; Gillett,  
778 D. L.; Dick, L. R.; Ralph, S. A.; Dogovski, C.; Spillman, N. J.; Tilley, L., Artemisinin kills malaria  
779 parasites by damaging proteins and inhibiting the proteasome. *Nat. Commun.* **2018**, *9* (1), 3801. DOI:  
780 10.1038/s41467-018-06221-1.
- 781 25. Lisewski, Andreas M.; Quiros, Joel P.; Ng, Caroline L.; Adikesavan, Anbu K.; Miura, K.;  
782 Putluri, N.; Eastman, Richard T.; Scandfeld, D.; Regenbogen, Sam J.; Altenhofen, L.; Llinás, M.;  
783 Sreekumar, A.; Long, C.; Fidock, David A.; Lichtarge, O., Supergenomic network compression and  
784 the discovery of EXP1 as a glutathione transferase inhibited by artesunate. *Cell* **2014**, *158* (4), 916-  
785 928. DOI: <http://dx.doi.org/10.1016/j.cell.2014.07.011>.
- 786 26. Mbengue, A.; Bhattacharjee, S.; Pandharkar, T.; Liu, H. N.; Estiu, G.; Stahelin, R. V.; Rizk,  
787 S. S.; Njimoh, D. L.; Ryan, Y.; Chotivanich, K.; Nguon, C.; Ghorbal, M.; Lopez-Rubio, J. J.;  
788 Pfrender, M.; Emrich, S.; Mohandas, N.; Dondorp, A. M.; Wiest, O.; Haldar, K., A molecular  
789 mechanism of artemisinin resistance in *Plasmodium falciparum* malaria. *Nature* **2015**, *520* (7549),  
790 683-687. DOI: 10.1038/nature14412.
- 791 27. Klonis, N.; Crespo-Ortiz, M. P.; Bottova, I.; Abu-Bakar, N.; Kenny, S.; Rosenthal, P. J.;  
792 Tilley, L., Artemisinin activity against *Plasmodium falciparum* requires hemoglobin uptake and  
793 digestion. *Proc. Natl. Acad. Sci. U. S. A.* **2011**, *108* (28), 11405-11410. DOI:  
794 10.1073/pnas.1104063108.
- 795 28. Krungkrai, S. R.; Yuthavong, Y., The antimalarial action on *Plasmodium falciparum* of  
796 qinghaosu and artesunate in combination with agents which modulate oxidant stress. *Trans. R. Soc.*  
797 *Trop. Med. Hyg.* **1987**, *81* (5), 710-714.

- 798 29. Hartwig, C. L.; Lauterwasser, E. M. W.; Mahajan, S. S.; Hoke, J. M.; Cooper, R. A.; Renslo,  
799 A. R., Investigating the antimalarial action of 1,2,4-trioxolanes with fluorescent chemical probes. *J.*  
800 *Med. Chem.* **2011**, *54* (23), 8207-8213. DOI: 10.1021/jm2012003.
- 801 30. Hartwig, C. L.; Rosenthal, A. S.; D'Angelo, J.; Griffin, C. E.; Posner, G. H.; Cooper, R. A.,  
802 Accumulation of artemisinin trioxane derivatives within neutral lipids of *Plasmodium falciparum*  
803 malaria parasites is endoperoxide-dependent. *Biochem. Pharmacol.* **2009**, *77* (3), 322-336. DOI:  
804 10.1016/j.bcp.2008.10.015.
- 805 31. Meshnick, S. R., Artemisinin: mechanisms of action, resistance and toxicity. *Int. J. Parasitol.*  
806 **2002**, *32* (13), 1655-1660.
- 807 32. Giannangelo, C.; Siddiqui, G.; De Paoli, A.; Anderson, B. M.; Edgington-Mitchell, L. E.;  
808 Charman, S. A.; Creek, D. J., System-wide biochemical analysis reveals ozonide antimalarials  
809 initially act by disrupting *Plasmodium falciparum* haemoglobin digestion. *PLoS Pathog.* **2020**, *16* (6),  
810 e1008485. DOI: 10.1371/journal.ppat.1008485.
- 811 33. Dondorp, A. M.; Nosten, F.; Yi, P.; Das, D.; Phyto, A. P.; Tarning, J.; Lwin, K. M.; Ariey, F.;  
812 Hanpithakpong, W.; Lee, S. J.; Ringwald, P.; Silamut, K.; Imwong, M.; Chotivanich, K.; Lim, P.;  
813 Herdman, T.; An, S. S.; Yeung, S.; Singhasivanon, P.; Day, N. P.; Lindegardh, N.; Socheat, D.;  
814 White, N. J., Artemisinin resistance in *Plasmodium falciparum* malaria. *N. Engl. J. Med.* **2009**, *361*  
815 (5), 455-467. DOI: 10.1056/NEJMoa0808859.
- 816 34. Das, S.; Saha, B.; Hati, A. K.; Roy, S., Evidence of artemisinin-resistant *Plasmodium*  
817 *falciparum* malaria in eastern India. *N. Engl. J. Med.* **2018**, *379* (20), 1962-1964. DOI:  
818 10.1056/NEJMc1713777.
- 819 35. Uwimana, A.; Legrand, E.; Stokes, B. H.; Ndikumana, J.-L. M.; Warsame, M.; Umulisa, N.;  
820 Ngamije, D.; Munyaneza, T.; Mazarati, J.-B.; Munguti, K.; Campagne, P.; Criscuolo, A.; Ariey, F.;  
821 Murindahabi, M.; Ringwald, P.; Fidock, D. A.; Mbituyumuremyi, A.; Menard, D., Emergence and  
822 clonal expansion of in vitro artemisinin-resistant *Plasmodium falciparum* kelch13 R561H mutant  
823 parasites in Rwanda. *Nature Medicine* **2020**. DOI: 10.1038/s41591-020-1005-2.
- 824 36. Miotto, O.; Sekihara, M.; Tachibana, S.-I.; Yamauchi, M.; Pearson, R. D.; Amato, R.;  
825 Gonçalves, S.; Mehra, S.; Noviyanti, R.; Marfurt, J.; Auburn, S.; Price, R. N.; Mueller, I.; Ikeda, M.;  
826 Mori, T.; Hirai, M.; Tavul, L.; Hetzel, M. W.; Laman, M.; Barry, A. E.; Ringwald, P.; Ohashi, J.;  
827 Hombhanje, F.; Kwiatkowski, D. P.; Mita, T., Emergence of artemisinin-resistant *Plasmodium*  
828 *falciparum* with *kelch13* C580Y mutations on the island of New Guinea. *PLoS Pathog.* **2020**, *16* (12),  
829 e1009133. DOI: 10.1371/journal.ppat.1009133.
- 830 37. Ashley, E. A.; Dhorda, M.; Fairhurst, R. M.; Amaratunga, C.; Lim, P.; Suon, S.; Sreng, S.;  
831 Anderson, J. M.; Mao, S.; Sam, B.; Sopha, C.; Chuor, C. M.; Nguon, C.; Sovannaroth, S.;  
832 Pukrittayakamee, S.; Jittamala, P.; Chotivanich, K.; Chutasmit, K.; Suchatsoonthorn, C.; Runcharoen,  
833 R.; Hien, T. T.; Thuy-Nhien, N. T.; Thanh, N. V.; Phu, N. H.; Htut, Y.; Han, K. T.; Aye, K. H.;  
834 Mokuolu, O. A.; Olaosebikan, R. R.; Folaranmi, O. O.; Mayxay, M.; Khanthavong, M.;  
835 Hongvanthong, B.; Newton, P. N.; Onyamboko, M. A.; Fanello, C. I.; Tshefu, A. K.; Mishra, N.;  
836 Valecha, N.; Phyto, A. P.; Nosten, F.; Yi, P.; Tripura, R.; Borrmann, S.; Bashraheil, M.; Peshu, J.;  
837 Faiz, M. A.; Ghose, A.; Hossain, M. A.; Samad, R.; Rahman, M. R.; Hasan, M. M.; Islam, A.; Miotto,  
838 O.; Amato, R.; MacInnis, B.; Stalker, J.; Kwiatkowski, D. P.; Bozdech, Z.; Jeeyapant, A.; Cheah, P.  
839 Y.; Sakulthaew, T.; Chalk, J.; Intharabut, B.; Silamut, K.; Lee, S. J.; Vihokhern, B.; Kunasol, C.;  
840 Imwong, M.; Tarning, J.; Taylor, W. J.; Yeung, S.; Woodrow, C. J.; Flegg, J. A.; Das, D.; Smith, J.;  
841 Venkatesan, M.; Plowe, C. V.; Stepniewska, K.; Guerin, P. J.; Dondorp, A. M.; Day, N. P.; White, N.  
842 J., Spread of artemisinin resistance in *Plasmodium falciparum* malaria. *N. Engl. J. Med.* **2014**, *371*  
843 (5), 411-423. DOI: 10.1056/NEJMoa1314981.
- 844 38. Thriemer, K.; Van Hong, N.; Rosanas-Urgell, A.; Phuc, B. Q.; Pockele, E.; Guetens, P.; Van  
845 Van, N.; Duong, T. T.; Amambua-Ngwa, A.; D'Alessandro, U., Delayed parasite clearance after  
846 treatment with dihydroartemisinin-piperazine in *Plasmodium falciparum* malaria patients in central  
847 Vietnam. *Antimicrob. Agents Chemother.* **2014**, *58* (12), 7049-7055.
- 848 39. Amaratunga, C.; Lim, P.; Suon, S.; Sreng, S.; Mao, S.; Sopha, C.; Sam, B.; Dek, D.; Try, V.;  
849 Amato, R.; Blessborn, D.; Song, L.; Tullo, G. S.; Fay, M. P.; Anderson, J. M.; Tarning, J.; Fairhurst,  
850 R. M., Dihydroartemisinin-piperazine resistance in *Plasmodium falciparum* malaria in Cambodia: a  
851 multisite prospective cohort study. *Lancet Infect. Dis.* **2016**, *16* (3), 357-365. DOI: 10.1016/S1473-  
852 3099(15)00487-9.



- 853 40. Spring, M. D.; Lin, J. T.; Manning, J. E.; Vanachayangkul, P.; Somethy, S.; Bun, R.; Se, Y.;  
854 Chann, S.; Ittiverakul, M.; Sia-ngam, P.; Kuntawunginn, W.; Arsanok, M.; Buathong, N.;  
855 Chaorattanakawee, S.; Gosi, P.; Ta-aksorn, W.; Chanarat, N.; Sundrakes, S.; Kong, N.; Heng, T. K.;  
856 Nou, S.; Teja-isavadharm, P.; Pichyangkul, S.; Phann, S. T.; Balasubramanian, S.; Juliano, J. J.;  
857 Meshnick, S. R.; Chour, C. M.; Prom, S.; Lanteri, C. A.; Lon, C.; Saunders, D. L.,  
858 Dihydroartemisinin-piperaquine failure associated with a triple mutant including kelch13 C580Y in  
859 Cambodia: an observational cohort study. *Lancet Infect. Dis.* **2015**, *15* (6), 683-691. DOI:  
860 10.1016/S1473-3099(15)70049-6.
- 861 41. Arieu, F.; Witkowski, B.; Amaratunga, C.; Beghain, J.; Langlois, A.-C.; Khim, N.; Kim, S.;  
862 Duru, V.; Bouchier, C.; Ma, L.; Lim, P.; Leang, R.; Duong, S.; Sreng, S.; Suon, S.; Chour, C. M.;  
863 Bout, D. M.; Menard, S.; Rogers, W. O.; Genton, B.; Fandeur, T.; Miotto, O.; Ringwald, P.; Le Bras,  
864 J.; Berry, A.; Barale, J.-C.; Fairhurst, R. M.; Benoit-Vical, F.; Mercereau-Puijalon, O.; Menard, D., A  
865 molecular marker of artemisinin-resistant *Plasmodium falciparum* malaria. *Nature* **2014**, *505* (7481),  
866 50-55. DOI: 10.1038/nature12876.
- 867 42. Witkowski, B.; Amaratunga, C.; Khim, N.; Sreng, S.; Chim, P.; Kim, S.; Lim, P.; Mao, S.;  
868 Sopha, C.; Sam, B.; Anderson, J. M.; Duong, S.; Chour, C. M.; Taylor, W. R.; Suon, S.; Mercereau-  
869 Puijalon, O.; Fairhurst, R. M.; Menard, D., Novel phenotypic assays for the detection of artemisinin-  
870 resistant *Plasmodium falciparum* malaria in Cambodia: *in-vitro* and *ex-vivo* drug-response studies.  
871 *Lancet Infect. Dis.* **2013**, *13* (12), 1043-1049. DOI: 10.1016/s1473-3099(13)70252-4.
- 872 43. Amaratunga, C.; Witkowski, B.; Dek, D.; Try, V.; Khim, N.; Miotto, O.; Menard, D.;  
873 Fairhurst, R. M., *Plasmodium falciparum* founder populations in western Cambodia have reduced  
874 artemisinin sensitivity *in vitro*. *Antimicrob. Agents Chemother.* **2014**, *58* (8), 4935-4937. DOI:  
875 10.1128/aac.03055-14.
- 876 44. Wellems, T. E.; Sá, J. M.; Su, X.-Z.; Connelly, S. V.; Ellis, A. C., 'Artemisinin Resistance':  
877 Something New or Old? Something of a Misnomer? *Trends Parasitol.* **2020**.
- 878 45. Giannangelo, C.; Fowkes, F. J. I.; Simpson, J. A.; Charman, S. A.; Creek, D. J., Ozonide  
879 antimalarial activity in the context of artemisinin-resistant malaria. *Trends in Parasitology* **2019**, *35*  
880 (7), 529-543. DOI: 10.1016/j.pt.2019.05.002.
- 881 46. Straimer, J.; Gnädig, N. F.; Stokes, B. H.; Ehrenberger, M.; Crane, A. A.; Fidock, D. A.,  
882 *Plasmodium falciparum* K13 mutations differentially impact ozonide susceptibility and parasite  
883 fitness *in vitro*. *mBio* **2017**, *8* (2), e00172-00117. DOI: 10.1128/mBio.00172-17.
- 884 47. Baumgärtner, F.; Jourdan, J.; Scheurer, C.; Blasco, B.; Campo, B.; Mäser, P.; Wittlin, S., *In*  
885 *vitro* activity of anti-malarial ozonides against an artemisinin-resistant isolate. *Malar. J.* **2017**, *16* (1),  
886 45. DOI: 10.1186/s12936-017-1696-0.
- 887 48. Siriwardana, A.; Iyengar, K.; Roepe, P. D., Endoperoxide drug cross-resistance patterns for  
888 *Plasmodium falciparum* exhibiting an artemisinin delayed-clearance phenotype. *Antimicrob. Agents*  
889 *Chemother.* **2016**, *60* (11), 6952-6956. DOI: 10.1128/aac.00857-16.
- 890 49. Schuh, A. K.; Rahbari, M.; Heimsch, K. C.; Mohring, F.; Gabryszewski, S. J.; Weder, S.;  
891 Buchholz, K.; Rahlfs, S.; Fidock, D. A.; Becker, K., Stable Integration and Comparison of hGrx1-  
892 roGFP2 and sroGFP2 Redox Probes in the Malaria Parasite *Plasmodium falciparum*. *ACS Infectious*  
893 *Diseases* **2018**, *4* (11), 1601-1612. DOI: 10.1021/acinfecdis.8b00140.
- 894 50. Xie, S. C.; Dogovski, C.; Hanssen, E.; Chiu, F.; Yang, T.; Crespo, M. P.; Stafford, C.;  
895 Batinovic, S.; Teguh, S.; Charman, S.; Klonis, N.; Tilley, L., Haemoglobin degradation underpins the  
896 sensitivity of early ring stage *Plasmodium falciparum* to artemisinins. *J Cell Sci* **2016**, *129* (2), 406-  
897 416. DOI: 10.1242/jcs.178830.
- 898 51. Cui, L.; Wang, Z.; Jiang, H.; Parker, D.; Wang, H.; Su, X.-Z.; Cui, L., Lack of association of  
899 the S769N mutation in *Plasmodium falciparum* SERCA (PfATP6) with resistance to artemisinins.  
900 *Antimicrob. Agents Chemother.* **2012**, *56* (5), 2546-2552.
- 901 52. Bhisutthibhan, J.; Meshnick, S. R., Immunoprecipitation of [(3)H]dihydroartemisinin  
902 translationally controlled tumor protein (TCTP) adducts from *Plasmodium falciparum*-infected  
903 erythrocytes by using anti-TCTP antibodies. *Antimicrobial agents and chemotherapy* **2001**, *45* (8),  
904 2397-2399. DOI: 10.1128/aac.45.8.2397-2399.2001.
- 905 53. Müller, S., Role and Regulation of Glutathione Metabolism in *Plasmodium falciparum*.  
906 *Molecules* **2015**, *20* (6), 10511-10534.

- 907 54. Kasozi, D.; Mohring, F.; Rahlfs, S.; Meyer, A. J.; Becker, K., Real-time imaging of the  
908 intracellular glutathione redox potential in the malaria parasite *Plasmodium falciparum*. *PLoS Pathog.*  
909 **2013**, *9* (12), e1003782. DOI: 10.1371/journal.ppat.1003782.
- 910 55. Mohring, F.; Rahbari, M.; Zechmann, B.; Rahlfs, S.; Przyborski, J. M.; Meyer, A. J.; Becker,  
911 K., Determination of glutathione redox potential and pH value in subcellular compartments of malaria  
912 parasites. *Free Radical Biology and Medicine* **2017**. DOI:  
913 <http://dx.doi.org/10.1016/j.freeradbiomed.2017.01.001>.
- 914 56. Michalski, A.; Cox, J.; Mann, M., More than 100,000 detectable peptide species elute in  
915 single shotgun proteomics runs but the majority is inaccessible to data-dependent LC-MS/MS. *J*  
916 *Proteome Res* **2011**, *10* (4), 1785-1793. DOI: 10.1021/pr101060v.
- 917 57. Gillet, L. C.; Navarro, P.; Tate, S.; Rost, H.; Selevsek, N.; Reiter, L.; Bonner, R.; Aebersold,  
918 R., Targeted data extraction of the MS/MS spectra generated by data-independent acquisition: a new  
919 concept for consistent and accurate proteome analysis. *Mol Cell Proteomics* **2012**, *11* (6), O111  
920 016717. DOI: 10.1074/mcp.O111.016717.
- 921 58. Cobbold, S. A.; Chua, H. H.; Nijagal, B.; Creek, D. J.; Ralph, S. A.; McConville, M. J.,  
922 Metabolic dysregulation induced in *Plasmodium falciparum* by dihydroartemisinin and other front  
923 line antimalarial drugs. *J. Infect. Dis.* **2015**, *213* (2), 276-286. DOI: 10.1093/infdis/jiv372.
- 924 59. Becker, K.; Tilley, L.; Vennerstrom, J. L.; Roberts, D.; Rogerson, S.; Ginsburg, H., Oxidative  
925 stress in malaria parasite-infected erythrocytes: host-parasite interactions. *Int. J. Parasitol.* **2004**, *34*  
926 (2), 163-189. DOI: 10.1016/j.ijpara.2003.09.011.
- 927 60. Patzewitz, E. M.; Salcedo-Sora, J. E.; Wong, E. H.; Sethia, S.; Stocks, P. A.; Maughan, S. C.;  
928 Murray, J. A.; Krishna, S.; Bray, P. G.; Ward, S. A.; Muller, S., Glutathione transport: a new role for  
929 PfCRT in chloroquine resistance. *Antioxid Redox Signal* **2013**, *19* (7), 683-695. DOI:  
930 10.1089/ars.2012.4625.
- 931 61. Gnadig, N. F.; Stokes, B. H.; Edwards, R. L.; Kalantarov, G. F.; Heimsch, K. C.; Kuderjavy,  
932 M.; Crane, A.; Lee, M. C. S.; Straimer, J.; Becker, K.; Trakht, I. N.; Odom John, A. R.; Mok, S.;  
933 Fidock, D. A., Insights into the intracellular localization, protein associations and artemisinin  
934 resistance properties of *Plasmodium falciparum* K13. *PLoS Pathog* **2020**, *16* (4), e1008482. DOI:  
935 10.1371/journal.ppat.1008482.
- 936 62. Siddiqui, G.; Srivastava, A.; Russell, A. S.; Creek, D. J., Multi-omics Based Identification of  
937 Specific Biochemical Changes Associated With PfKelch13-Mutant Artemisinin-Resistant  
938 *Plasmodium falciparum*. *J Infect Dis* **2017**, *215* (9), 1435-1444. DOI: 10.1093/infdis/jix156.
- 939 63. Wu, W.-M.; Wu, Y.; Wu, Y.-L.; Yao, Z.-J.; Zhou, C.-M.; Li, Y.; Shan, F., Unified  
940 mechanistic framework for the Fe (II)-induced cleavage of qinghaosu and derivatives/analogues. The  
941 first spin-trapping evidence for the previously postulated secondary C-4 radical. *J. Am. Chem. Soc.*  
942 **1998**, *120* (14), 3316-3325.
- 943 64. Robert, A.; Coppel, Y.; Meunier, B., Alkylation of heme by the antimalarial drug artemisinin.  
944 *Chem. Commun. (Camb.)* **2002**, *5*, 414-415.
- 945 65. Wang, D.-Y.; Wu, Y.-L., A possible antimalarial action mode of qinghaosu (artemisinin)  
946 series compounds. Alkylation of reduced glutathione by C-centered primary radicals produced from  
947 antimalarial compound qinghaosu and 12-(2,4-dimethoxyphenyl)-12-deoxyqinghaosu. *Chem*  
948 *Commun* **2000**, *22*, 2193-2194.
- 949 66. Mohring, F.; Jortzik, E.; Becker, K., Comparison of methods probing the intracellular redox  
950 milieu in *Plasmodium falciparum*. *Mol Biochem Parasitol* **2016**, *206* (1-2), 75-83. DOI:  
951 10.1016/j.molbiopara.2015.11.002.
- 952 67. Rahbari, M.; Rahlfs, S.; Jortzik, E.; Bogeski, I.; Becker, K., H<sub>2</sub>O<sub>2</sub> dynamics in the malaria  
953 parasite *Plasmodium falciparum*. *PLoS One* **2017**, *12* (4), e0174837. DOI:  
954 10.1371/journal.pone.0174837.
- 955 68. Antoine, T.; Fisher, N.; Amewu, R.; O'Neill, P. M.; Ward, S. A.; Biagini, G. A., Rapid kill of  
956 malaria parasites by artemisinin and semi-synthetic endoperoxides involves ROS-dependent  
957 depolarization of the membrane potential. *J Antimicrob Chemother* **2014**, *69* (4), 1005-1016. DOI:  
958 10.1093/jac/dkt486.
- 959 69. Coertzen, D.; Reader, J.; van der Watt, M.; Nondaba, S. H.; Gibhard, L.; Wiesner, L.; Smith,  
960 P.; D'Alessandro, S.; Taramelli, D.; Wong, H. N.; du Preez, J. L.; Wu, R. W. K.; Birkholtz, L. M.;  
961 Haynes, R. K., Artemisone and Artemiside Are Potent Panreactive Antimalarial Agents That Also



- 962 Synergize Redox Imbalance in *Plasmodium falciparum* Transmissible Gametocyte Stages. *Antimicrob*  
963 *Agents Chemother* **2018**, 62 (8). DOI: 10.1128/AAC.02214-17.
- 964 70. Witkowski, B.; Lelievre, J.; Nicolau-Travers, M. L.; Iriart, X.; Njomnang Soh, P.; Bousejra-  
965 Elgarah, F.; Meunier, B.; Berry, A.; Benoit-Vical, F., Evidence for the contribution of the hemozoin  
966 synthesis pathway of the murine *Plasmodium yoelii* to the resistance to artemisinin-related drugs.  
967 *PLoS One* **2012**, 7 (3), e32620. DOI: 10.1371/journal.pone.0032620.
- 968 71. Phompradit, P.; Chaijaroenkul, W.; Na-Bangchang, K., Cellular mechanisms of action and  
969 resistance of *Plasmodium falciparum* to artemisinin. *Parasitol. Res.* **2017**, 116, 3331-3339. DOI:  
970 10.1007/s00436-017-5647-z.
- 971 72. Chandra, R.; Tripathi, L. M.; Saxena, J. K.; Puri, S. K., Implication of intracellular  
972 glutathione and its related enzymes on resistance of malaria parasites to the antimalarial drug  
973 arteether. *Parasitol. Int.* **2011**, 60 (1), 97-100. DOI: 10.1016/j.parint.2010.09.009.
- 974 73. Jortzik, E.; Becker, K., Thioredoxin and glutathione systems in *Plasmodium falciparum*. *Int J*  
975 *Med Microbiol* **2012**, 302 (4-5), 187-194. DOI: 10.1016/j.ijmm.2012.07.007.
- 976 74. Trager, W.; Jensen, J. B., Human malaria parasites in continuous culture. *Science* **1976**, 193  
977 (4254), 673-675. DOI: 10.1126/science.781840.
- 978 75. Dong, Y.; Chollet, J.; Matile, H.; Charman, S. A.; Chiu, F. C.; Charman, W. N.; Scoreaux,  
979 B.; Urwyler, H.; Santo Tomas, J.; Scheurer, C., Spiro and dispiro-1, 2, 4-trioxolanes as antimalarial  
980 peroxides: charting a workable structure-activity relationship using simple prototypes. *J. Med. Chem.*  
981 **2005**, 48 (15), 4953-4961.
- 982 76. Wu, J.; Wang, X.; Chiu, F. C.; Haberli, C.; Shackelford, D. M.; Ryan, E.; Kamaraj, S.;  
983 Bulbule, V. J.; Wallick, A. I.; Dong, Y., Structure-activity relationship of antischistosomal ozonide  
984 carboxylic acids. *J. Med. Chem.* **2020**, 63 (7), 3723-3736.
- 985 77. Rappsilber, J.; Ishihama, Y.; Mann, M., Stop and go extraction tips for matrix-assisted laser  
986 desorption/ionization, nanoelectrospray, and LC/MS sample pretreatment in proteomics. *Anal. Chem.*  
987 **2003**, 75 (3), 663-670. DOI: 10.1021/ac026117i.
- 988 78. Birrell, G. W.; Challis, M. P.; De Paoli, A.; Anderson, D.; Devine, S. M.; Heffernan, G. D.;  
989 Jacobus, D. P.; Edstein, M. D.; Siddiqui, G.; Creek, D. J., Multi-omic characterisation of the mode of  
990 action of a potent new antimalarial compound, JPC-3210, against *Plasmodium falciparum*. *Mol. Cell.*  
991 *Proteomics* **2019**, mcp.RA119.001797. DOI: 10.1074/mcp.RA119.001797.
- 992 79. Alexa, A.; Rahnenführer, J. *topGO: Enrichment Analysis for Gene Ontology*, R package  
993 version 2.42.0; 2020.
- 994 80. Alexa, A.; Rahnenführer, J.; Lengauer, T., Improved scoring of functional groups from gene  
995 expression data by decorrelating GO graph structure. *Bioinformatics* **2006**, 22 (13), 1600-1607. DOI:  
996 10.1093/bioinformatics/btl140.
- 997 81. Schlicker, A.; Domingues, F. S.; Rahnenführer, J.; Lengauer, T., A new measure for  
998 functional similarity of gene products based on Gene Ontology. *BMC bioinformatics* **2006**, 7 (1), 302.  
999 DOI: 10.1186/1471-2105-7-302.
- 1000 82. Perez-Riverol, Y.; Csordas, A.; Bai, J.; Bernal-Llinares, M.; Hewapathirana, S.; Kundu, D. J.;  
1001 Inuganti, A.; Griss, J.; Mayer, G.; Eisenacher, M.; Perez, E.; Uszkoreit, J.; Pfeuffer, J.; Sachsenberg,  
1002 T.; Yilmaz, S.; Tiwary, S.; Cox, J.; Audain, E.; Walzer, M.; Jarnuczak, A. F.; Ternent, T.; Brazma, A.;  
1003 Vizcaino, J. A., The PRIDE database and related tools and resources in 2019: improving support for  
1004 quantification data. *Nucleic Acids Res* **2019**, 47 (D1), D442-D450. DOI: 10.1093/nar/gky1106.
- 1005 83. Schindelin, J.; Arganda-Carreras, I.; Frise, E.; Kaynig, V.; Longair, M.; Pietzsch, T.;  
1006 Preibisch, S.; Rueden, C.; Saalfeld, S.; Schmid, B., Fiji: an open-source platform for biological-image  
1007 analysis. *Nature methods* **2012**, 9 (7), 676-682.
- 1008 84. Behringer, S.; Wingert, V.; Oria, V.; Schumann, A.; Grunert, S.; Cieslar-Pobuda, A.; Kolker,  
1009 S.; Lederer, A. K.; Jacobsen, D. W.; Staerk, J.; Schilling, O.; Spiekerkoetter, U.; Hannibal, L.,  
1010 Targeted Metabolic Profiling of Methionine Cycle Metabolites and Redox Thiol Pools in Mammalian  
1011 Plasma, Cells and Urine. *Metabolites* **2019**, 9 (10). DOI: 10.3390/metabo9100235.
- 1012 85. Ortmayr, K.; Schwaiger, M.; Hann, S.; Koellensperger, G., An integrated metabolomics  
1013 workflow for the quantification of sulfur pathway intermediates employing thiol protection with N-  
1014 ethyl maleimide and hydrophilic interaction liquid chromatography tandem mass spectrometry.  
1015 *Analyst* **2015**, 140 (22), 7687-7695. DOI: 10.1039/C5AN01629K.

1016

1017

1018 **Figure Legends:**

1019

1020 **Figure 1. Identification of peroxide antimalarial molecular targets by click chemistry-based**  
1021 **chemical proteomics.** (A) Molecular structures of clickable alkyne probes OZ727, OZ747, AA2 and  
1022 carbaOZ727, and their associated non-clickable controls OZ03, OZ277, OZ439, Art (artemisinin) and  
1023 DHA (dihydroartemisinin). Activity of test compounds against *P. falciparum* 3D7 (nM) is shown as  
1024 the mean  $\pm$  SEM of data from three independent replicates with at least two technical repeats. (B)  
1025 General workflow of the copper-catalysed click chemistry approach used to identify protein targets of  
1026 peroxide antimalarials. *P. falciparum* parasites are incubated with the alkyne probes, which get  
1027 activated (star) by free haem (H) derived from haemoglobin (Hb) digestion to form free radicals that  
1028 can alkylate protein targets in the cell. The alkyne-modified proteins are affinity purified by covalent  
1029 attachment to azide agarose beads using copper-catalysed click chemistry, and identified using data  
1030 independent acquisition (DIA) LCMS/MS. The complex spectra obtained from the MS is then  
1031 processed using a reference in-house *P. falciparum* spectral library in Spectronaut™ Software. As an  
1032 additional strategy to identify biologically relevant protein targets, peroxide activation was blocked *in*  
1033 *situ* with the falcipain haemoglobinase inhibitor, E64d, which antagonises the antimalarial effects of  
1034 peroxides, and the non-clickable parent ozonide, OZ03, served as a competitive inhibitor of probe  
1035 binding *in situ* to distinguish specific versus non-specific protein hits. Control conditions are shown in  
1036 red text.

1037

1038 **Figure 2. Protein binding targets of peroxide antimalarials in *P. falciparum*.** (A) Heatmap  
1039 representation of all protein binding targets of OZ727, OZ747 and AA2 following treatment of *P.*  
1040 *falciparum* infected RBCs for 1 h (all 300 nM). Heatmap analysis was performed by plotting the  
1041 average log transformed protein abundance for each protein and normalising by the mean for that  
1042 protein across all samples. Proteins in the OZ727 (n = 6), OZ747 (n = 5) and AA2 (n = 4) groups with  
1043 a fold-change  $\geq 2$  compared to the DMSO (n = 9), carbaOZ727 (n = 7) and OZ03 (n = 3) controls, and  
1044 with a p-value  $< 0.05$  (Mann-Whitney *U* test) compared to carbaOZ727 or DMSO, were considered as  
1045 protein binding targets. Protein labelling by OZ727 was decreased in the presence of increasing  
1046 concentrations of the active non-clickable parent ozonide, OZ03 (n = 3-4), and by pre-incubation of  
1047 parasite cultures with the cysteine haemoglobinase inhibitor, E64d (n = 4). For additional protein  
1048 information see Supplementary Data 1. (B) Histogram showing that the 436 proteins identified as  
1049 peroxide binding targets across all study timepoints (red) are distributed across the *P. falciparum*  
1050 blood stage protein abundance range and not limited to the most abundant proteins within the parasite.  
1051 The frequency distribution of proteins in the *P. falciparum* blood stage proteome (Siddiqui et al.,  
1052 unpublished data) is shown in blue.

**Figure 3. Gene ontology (GO) biological process enrichment of *P. falciparum* proteins covalently interacting with peroxide antimalarials.** Peroxide protein targets are involved in multiple vital biological processes. GO analysis was conducted using topGO. PlasmoDB GO terms were used for GO term mapping and the elim algorithm was applied to navigate the topology of the GO graph. The Fisher exact test was used for testing enrichment of GO terms. *P. falciparum* proteins from the in-house spectral library acted as the genomic background for statistical testing, and GO terms represented by fewer than five proteins in this library were excluded from the analysis. Significantly enriched GO terms ( $p < 0.05$ ) were filtered to exclude those with  $< 1.5$ -fold enrichment of protein identifications relative to the background library. These were then visualised with Cytoscape 3.6 and manually clustered based on the protein targets shared between GO terms and the semantic similarity measure of Schlicker *et al.*<sup>81</sup>. Node size represents P-value. Node colour represents the median fold-change (vs DMSO) for proteins within each GO term. GO-term clusters that were also represented in an identical analysis of proteins identified in control samples are shaded grey.

**Figure 4. Effects of peroxide antimalarials on the redox ratio of *P. falciparum* NF54attB<sup>lhGrx1-roGFP2</sup> parasites.** NF54attB<sup>lhGrx1-roGFP2</sup> transgenic parasites were treated with DHA, OZ277 and OZ439 at 300 nM and samples were taken at 3 h post treatment for DHA, OZ277 and OZ439 and at 6 h for OZ277 and OZ439 for the measurement of fluorescence ratio of the redox sensor. Fluorescence ratio of the redox sensor increased for parasites treated with OZ277 and OZ439 for 3 and 6 h treatments, while DHA treatment did not change the redox ratio as measured with confocal laser scanning microscopy (CLSM, A and B). Oxidised (405 nm), reduced (488 nm), BF: bright field, merge: is an overlay of all the panels. The black magnification bar represents 2  $\mu\text{m}$ . Plate reader measurement of the redox ratio following treatment of transgenic parasites with DHA (300 nM (C), 1  $\mu\text{M}$  (D)), OZ277 (300 nM (E), 1  $\mu\text{M}$  (F)) and OZ439 (300 nM (G), 1  $\mu\text{M}$  (H)) showed the same results as CLSM, where only the ozonides affected the redox ratio and this ratio increased over the duration of drug exposure. DMSO-treated parasites at the longest drug incubation duration acted as control, DTT (10 mM, 5 min treatment) was the fully reduced control, while DIAM (1 mM, 5 min treatment) was the fully oxidised control. Columns represent the mean of at least 2 independent experiments with the error bars expressed as SEM. CLSM data were composed of 15-35 trophozoites analysed per experiment for each condition. P-value was calculated using one-way ANOVA, (\*,  $p < 0.05$ ; \*\*,  $p < 0.01$ ; \*\*\*,  $p < 0.001$ ; \*\*\*\*,  $p < 0.0001$ ).

**Figure 5. Effect of peroxide antimalarials on thiol levels in *P. falciparum* 3D7 infected RBCs.** (A) Schematic of glutathione biosynthesis pathway. (B) Determination of relative levels of NEM-derivatised cysteine (Cys),  $\gamma$ -glutamyl-cysteine ( $\gamma$ -GluCys), reduced glutathione (GSH) and oxidised glutathione (GSSG) compared to DMSO control in *P. falciparum* 3D7 parasites following treatment with DHA (100 nM, 3 h treatment), OZ277 (300 nM, 3 h treatment), OZ439 (300 nM, 6 h treatment) and pyrimethamine (PYR) (1  $\mu$ M, 5 h treatment) using method 3. DTT (10 mM, 5 min treatment) was the fully reduced control, while DIAM (1 mM, 5 min treatment) was the fully oxidised control. Bars represent the fold change (mean  $\pm$  SEM) compared to DMSO control. Thiol measurement is from 2-5 biological replicates (with four technical within each biological). P-value was calculated using one-way ANOVA, (\*,  $p < 0.05$ ; \*\*,  $p < 0.01$ ,  $p < 0.01$ ; \*\*\*,  $p < 0.0001$ ; \*\*\*\*).

**A**

Parent peroxides

Alkyne peroxide probes

bioRxiv preprint doi: <https://doi.org/10.1101/2021.09.10.459878>; this version posted September 14, 2021. The copyright holder for this preprint (which was not certified by peer review) is the author/funder. All rights reserved. No reuse allowed without permission.

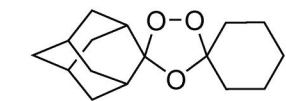OZ03  $8.3 \pm 0$ 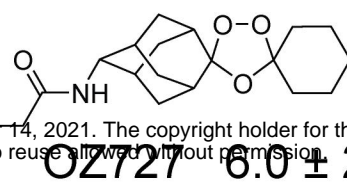OZ727  $6.0 \pm 2$ 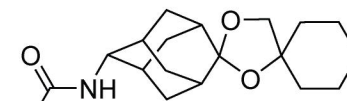carbaOZ727  $>10 \mu\text{M}$ 

Ozonides

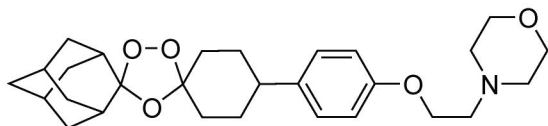OZ439  $1.9 \pm 1$ 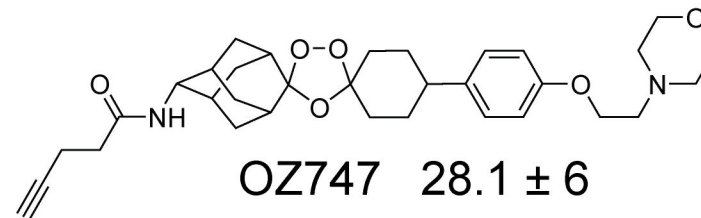OZ747  $28.1 \pm 6$ 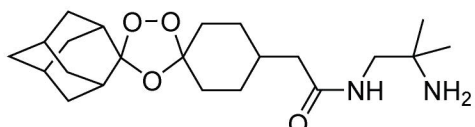OZ277  $1.7 \pm 1$ 

Artemisinins

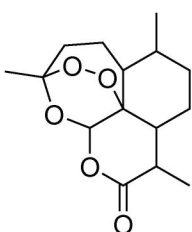Art  $8.5 \pm 1$ 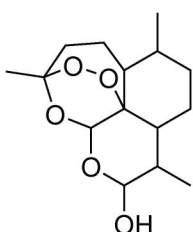DHA  $8.7 \pm 3$ 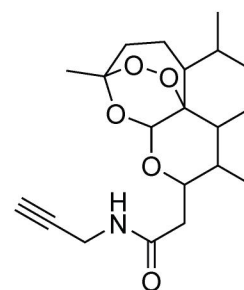AA2  $12.5 \pm 2$ **B**

+/- active probe (OZ727, OZ747 &amp; AA2)

+/- active OZ (OZ03)

+/- inactive probe (carbaOZ727)

time (h)  
0 1 3 6

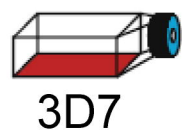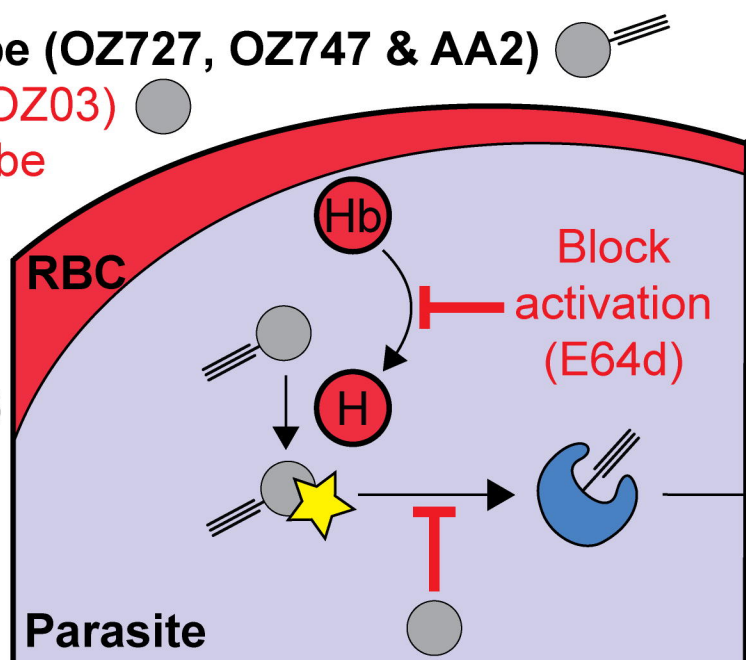

Competitive inhibition

Reference spectral library

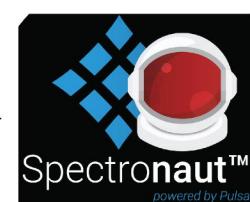

Affinity purification

On-bead digestion

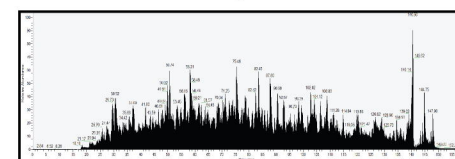

DIA-MS

**A**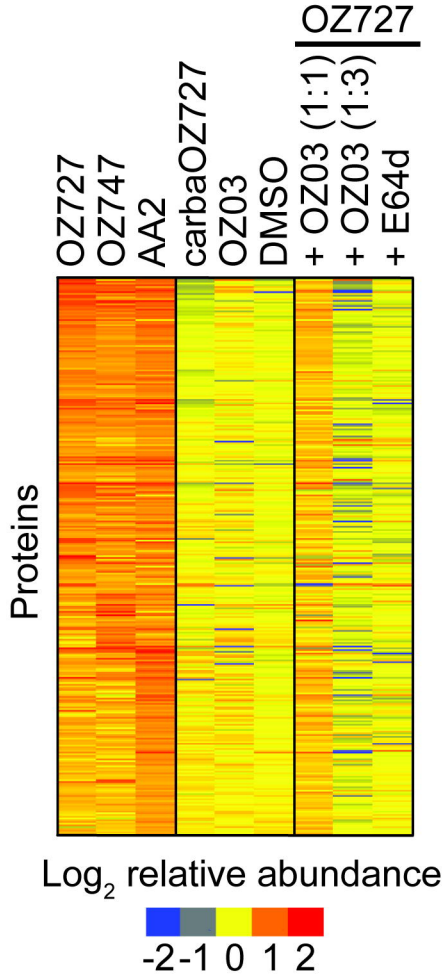**B**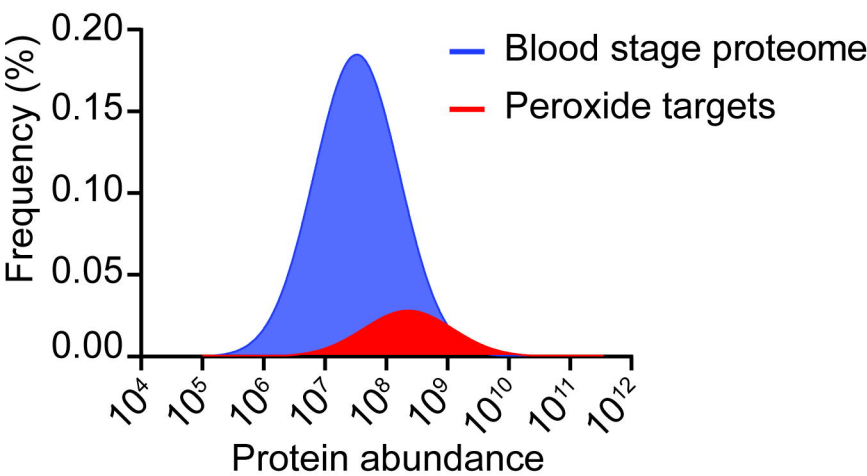





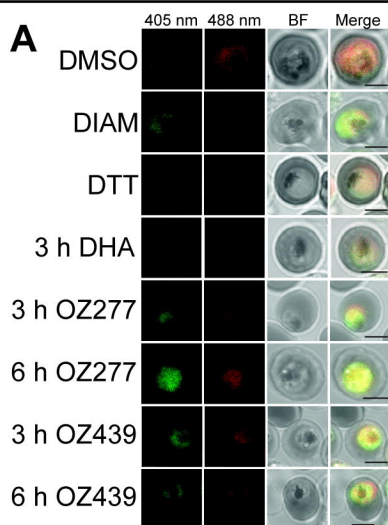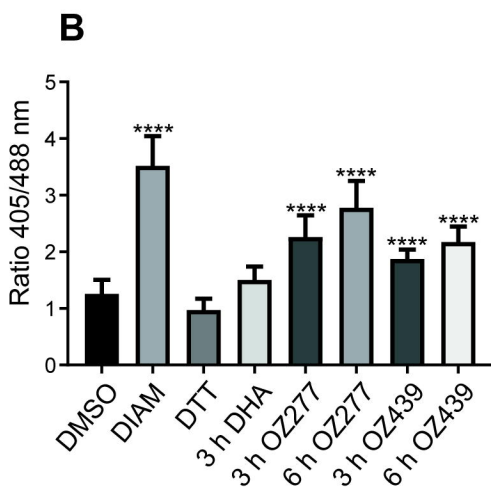

## plate reader

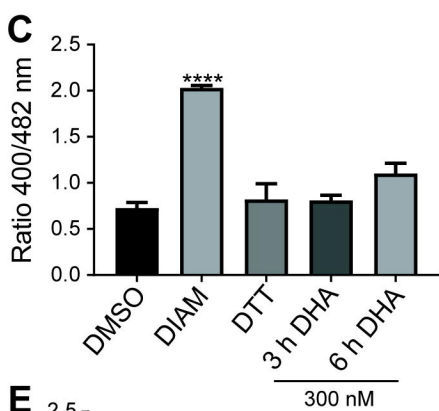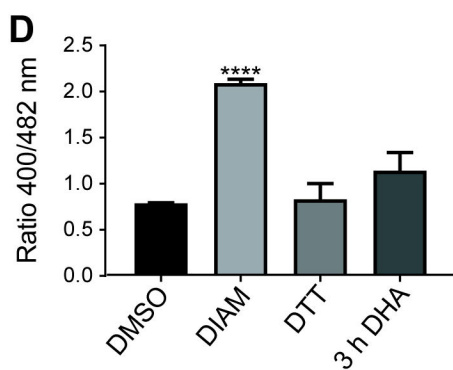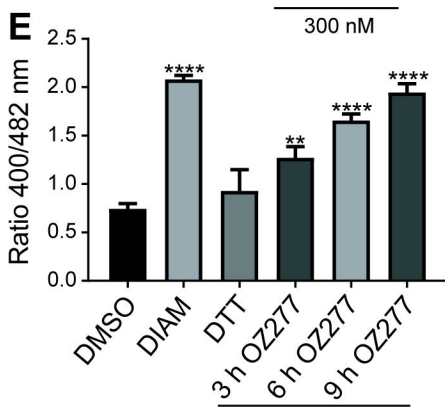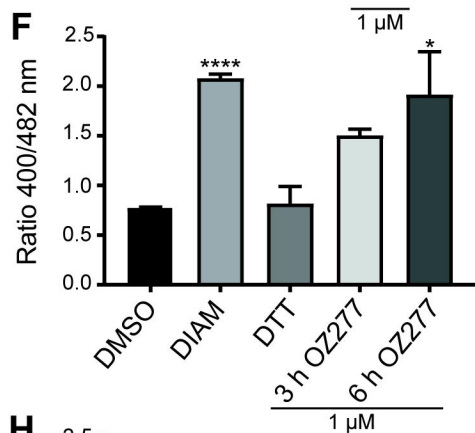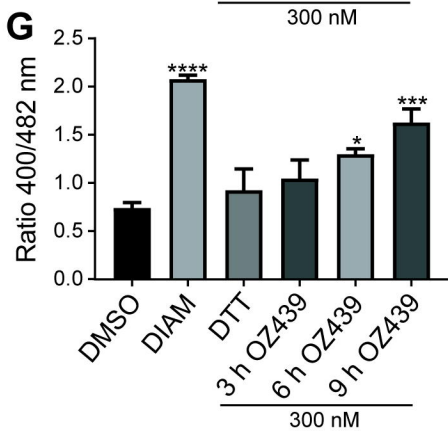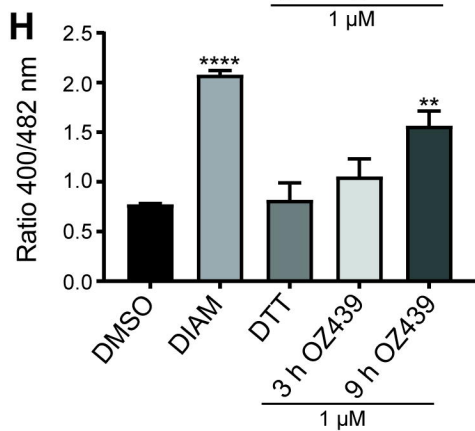

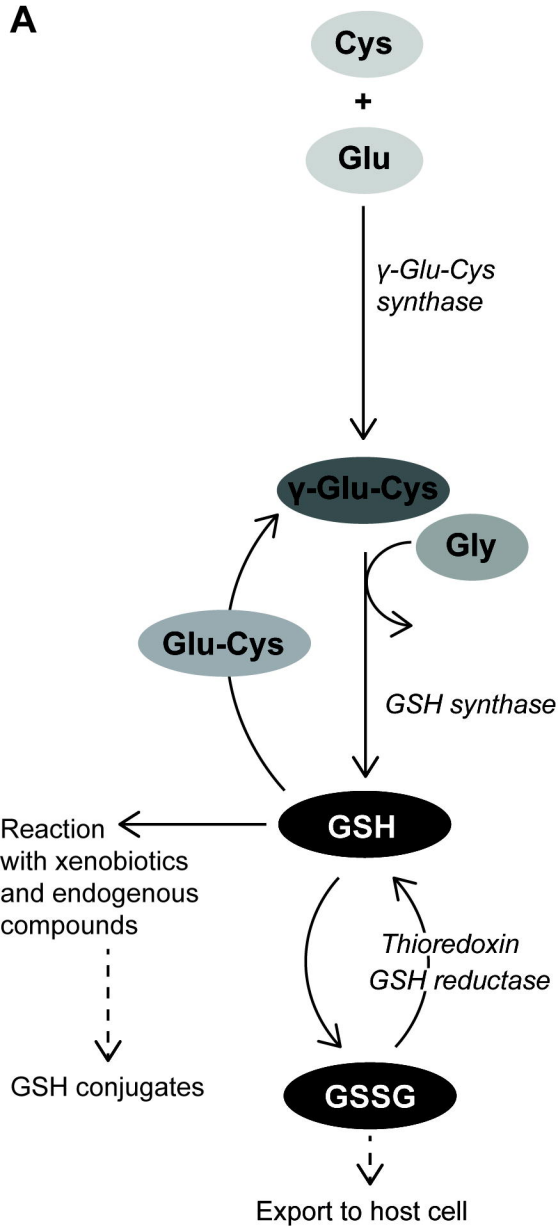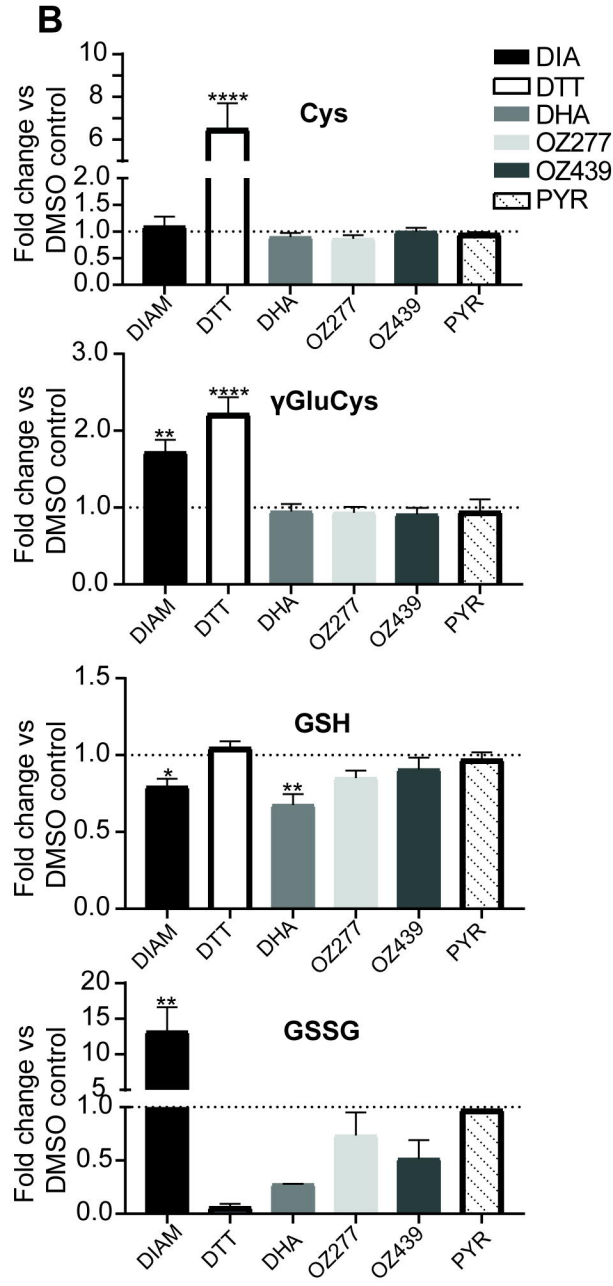

Source: https://www.biorxiv.org/content/10.1101/2021.09.10.459878v2.full.pdf
